1 **CXCR5 gene expression in human lymph node CD8<sup>+</sup> T cells is regulated by DNA**  
2 **methylation and nucleosomal occupancy**

3

4 Funsho J. Ogunshola<sup>a,b,i</sup>, Werner Smidt<sup>a,d</sup>, Anneta F. Naidoo<sup>f</sup>, Thandeka Nkosi<sup>a,c</sup>,  
5 Thandekile Ngubane<sup>e</sup>, Trevor Khaba<sup>c</sup>, Omolara O. Baiyegunhi<sup>a,c</sup>, Sam Rasehlo<sup>a</sup>,  
6 Ismail Jajbhay<sup>e</sup>, Krista L. Dong<sup>b</sup>, Veron Ramsuran<sup>d</sup>, Johan Pansegrouw<sup>e</sup>, Thumbi  
7 Ndung'u<sup>a,b, c,g</sup>, Bruce D. Walker<sup>b,c,h,i</sup>, Tulio de Oliveria<sup>d</sup> and Zaza M. Ndhlovu<sup>a,b,c,i\*</sup>.

8

9

10 <sup>a</sup>Africa Health Research Institute (AHRI), Durban, South Africa.

11 <sup>b</sup>Ragon Institute of Massachusetts General Hospital, Massachusetts Institute of  
12 Technology, and Harvard University, Cambridge, MA 02139 USA.

13 <sup>c</sup>HIV Pathogenesis Programme, Doris Duke Medical Research Institute, Nelson R.  
14 Mandela School of Medicine, University of KwaZulu-Natal, Durban, South Africa.

15 <sup>d</sup>KwaZulu-Natal Research Innovation and Sequencing Platform (KRISP), University of  
16 KwaZulu-Natal, Durban, South Africa.

17 <sup>e</sup>Prince Mshiyeni Memorial Hospital, Durban, South Africa.

18 <sup>f</sup>HIV Vaccine Trial Network (HVTN), Cape Town, South Africa.

19 <sup>g</sup>Max Planck Institute for Infection Biology, Berlin, Germany.

20 <sup>h</sup>Institute for Medical Engineering and Sciences and Department of Biology,  
21 Massachusetts Institute of Technology, Cambridge MA 02139 USA

22 <sup>i</sup>Howard Hughes Medical Institute, Chevy Chase MD 20815 USA

23

24 \*Corresponding author: Zaza Mtine Ndhlovu

25 [zndhlovu@mgh.harvard.edu](mailto:zndhlovu@mgh.harvard.edu)

26

27 **Abstract**

28

29 CD8<sup>+</sup> T cells play an important role in viral and tumour control. However, in human  
30 lymph nodes (LNs), only a small subset of CD8<sup>+</sup> T cells called follicular CD8<sup>+</sup> T cells  
31 (fCD8s) expresses CXCR5, the chemokine receptor required for cell migration into B  
32 cell follicles, thought to promote immune evasion. Here we obtained LNs from HIV  
33 infected persons to investigate regulation of CXCR5 expression in lymphoid CD8<sup>+</sup> T  
34 cells, and compared this to the more abundant CXCR5 expressing T follicular CD4<sup>+</sup>  
35 helper cells (GCTfh). Our results show that DNA hypermethylation and closed  
36 chromatin at the transcriptional start site (TSS) prevent CXCR5 expression in non-  
37 fCD8s. We also found that greater nucleosomal density at the CXCR5 TSS could be  
38 responsible for reduced CXCR5 expression in fCD8s relative to GCTfh. Together,  
39 these data provide critical insights into both the underlying molecular mechanisms that  
40 repress CXCR5 expression in non-fCD8s and the plausible mechanism responsible  
41 for the low CXCR5 expression in fCD8s, with implications for HIV cure strategies.

42

43 Word count (163)

44

45 **Author Summary**

46

47 A paucity of CD8<sup>+</sup> T cells that express CXCR5, the chemokine receptor critical for  
48 entering the B cell follicles of secondary lymphoid tissues have recently been  
49 described. Animal studies have revealed transcriptional networks that govern the  
50 expression of CXCR5 in CD8<sup>+</sup> T cells. However, it is not known if similar or additional  
51 networks regulate the expression of CXCR5 in human CD8<sup>+</sup> T cells. In this study, we

52 demonstrated that DNA methylation coupled with chromatin compaction at the  
53 transcriptional start site (TSS) of *CXCR5* gene prevent the expression *CXCR5* in  
54 human CD8<sup>+</sup> T cells. In addition, we observed greater nucleosomal occupancy at the  
55 TSS of *CXCR5* gene which could impact expression levels of *CXCR5* in human  
56 *CXCR5*<sup>+</sup>CD8<sup>+</sup> T cells. This study revealed multitiered epigenetic mechanisms that  
57 repress *CXCR5* expression in human CD8<sup>+</sup> T cells, with implications for HIV cure  
58 strategy or eradication of B cell-derived tumours.

59

60

## 61 **Introduction**

62

63 Upon infection, viral antigens prime naïve CD8<sup>+</sup> T cells in secondary lymphoid tissues  
64 to differentiate into effector cytotoxic CD8<sup>+</sup> T cells and migrate to sites of infection,  
65 guided by chemokine-chemokine receptor interactions (1). In the case of human  
66 immunodeficiency virus (HIV) infection, secondary lymphoid tissues serve as the  
67 major site of replication (2-4); and germinal centers (GCs) in the B cell follicles of LN  
68 serve as major sites of HIV persistence during suppressive antiretroviral therapy  
69 (ART) (5-7). *CXCR5* expression facilitates direct trafficking of T cells to GCs by  
70 sensing *CXCL13* producing cells, which reside within LNs (8-10). However, CD8<sup>+</sup> T  
71 cells typically lack *CXCR5* expression and are therefore generally excluded from B  
72 cell follicles within LN (11, 12) which is thought to be partially responsible for HIV  
73 persistence in this compartment, particularly during ART (13, 14). Similar mechanisms  
74 contribute to persistence of tumours in lymphoid tissues (15). Thus, development of  
75 novel strategies for boosting pathogen-specific CD8<sup>+</sup> T cell migration to B cell follicles

76 could enhance immune clearance of HIV infected cells and tumour cells such as B cell  
77 lymphomas.

78

79 A small subset CXCR5 expressing CD8<sup>+</sup> T cells called follicular CD8<sup>+</sup> T cells (fCD8)  
80 has recently been described, to have the capacity to infiltrate B cell follicles and  
81 eliminate HIV infected cells or tumour cells (16-18). Human and animal studies have  
82 shown that the frequency of fCD8s inversely correlates with HIV or simian  
83 immunodeficiency virus (SIV) viral load (16, 19, 20), suggesting that increased  
84 infiltration of fCD8s in B cell follicles can result in enhanced immune control. Indeed,  
85 some studies demonstrate direct anti-HIV activity of fCD8s (16, 17). In addition, in the  
86 SIV model, CD8<sup>+</sup> T depletion is associated with modest increase of SIV infected cells  
87 in B cell follicles (12), suggesting their involvement in mediating control of virus  
88 replication in the follicles. Moreover, in follicular lymphoma (FL), the second most  
89 frequent B-Cell lymphoma in adults (21), increased infiltration of CD8<sup>+</sup> T cells into B  
90 cell follicles is associated with improved disease prognosis (18). Thus, detailed  
91 understanding of the regulatory mechanisms that govern the expression of CXCR5,  
92 the chemokine receptor required for CD8<sup>+</sup> T cells migration to B cell follicles is highly  
93 relevant to the development of curative strategies for HIV and B cell lymphomas (18).

94

95 Animal studies have attempted to define the transcriptional regulatory networks that  
96 distinguish fCD8s from non-fCD8s. These studies have implicated a number of  
97 transcriptional factors (TFs) including B lymphocyte-induced maturation protein-1  
98 (Blimp1) and B-cell lymphoma 6 protein (BCL6) coupled with T-cell factor 1 (TCF1),  
99 and inhibitor DNA binding 2 and 3 (Id2 and Id3), which together form a transcriptional  
100 circuit that govern fCD8 differentiation (16, 22). Additionally, *in vitro* stimulation of

101 CD8<sup>+</sup> T cells from rhesus macaques with inflammatory cytokines such as TGF- $\beta$ , IL-  
102 12 and IL-23 promotes fCD8 differentiation (23). Together, these studies provide an  
103 important framework for potential regulatory networks. However, the underlying  
104 molecular processes that govern fCD8 differentiation remain largely unknown.  
105 Moreover, it is not yet clear how these animal studies translate to human diseases.

106

107 Here we report a detailed investigation of the epigenetic and transcriptional processes  
108 that regulate *CXCR5* gene expression in human CD8<sup>+</sup> T cells. We test the hypothesis  
109 that epigenetic mechanisms, acting in conjunction with specific transcription factors,  
110 play a critical role in regulating *CXCR5* expression on human CD8<sup>+</sup> T cells (24). This  
111 hypothesis is based on the premise that epigenetic mechanisms such as DNA  
112 methylation, chromatin state and accessibility influence gene expression during cell  
113 differentiation and maturation (24-26). Furthermore, the density and positioning of  
114 nucleosomes around the genomic DNA can regulate the levels of a gene expression  
115 by modulating DNA accessibility to TFs (27).

116

117 To test this hypothesis, we investigated *CXCR5* gene regulation in lymphoid CD8<sup>+</sup> T  
118 cells in the setting of HIV infection using DNA bisulfite sequencing in combination with  
119 the Assay for Transposase-Accessible Chromatin using Sequencing (ATAC-Seq) and  
120 RNA-Seq. We found that DNA methylation and chromatin conformation regulate  
121 *CXCR5* in human CD8<sup>+</sup> T cells. Computational analysis further revealed nucleosomal  
122 occupancy and positioning around the TSS of the *CXCR5* gene as a plausible  
123 mechanism involved in limiting the expression of *CXCR5* in fCD8s. This study reveals  
124 epigenetic processes that play a pivotal role in limiting the expression of *CXCR5* in  
125 human CD8<sup>+</sup> T cells. These results could be the basis for rationale development of

126 novel strategies for increasing CD8<sup>+</sup> T cells trafficking into B cell follicles where they  
127 are needed to clear pathogens such as HIV and B cell lymphomas.

128

129

## 130 **Results**

131

### 132 **Description of study samples and design**

133 This study included 17 participants from the FRESH (Female Rising through  
134 Education, Support and Health) program, a socioeconomic and HIV prevention  
135 intervention for HIV uninfected women at high risk of infection in KwaZulu Natal, South  
136 Africa, designed to facilitate identification of hyperacute infection (28). Participants  
137 were classified into 3 groups. Group 1 consisted of 5 HIV negative participants. Group  
138 2 included 7 HIV infected individuals who were on ART for >1 year and were fully  
139 suppressed at the time of sample collection. Group 3 included 5 individuals with  
140 untreated HIV infection for >1 year with median viral load of 15,068 copies/ml at the  
141 time of sample collection. Subjects and time-points were chosen based on sample  
142 availability. The clinical characteristics of the study participants are summarized in  
143 **Table 1.**

144

145 To address our hypothesis, we conducted a series of experiments using one excisional  
146 LN and paired peripheral blood sample per study participant. We began by performing  
147 flow cytometry on all 17 LN samples to establish the frequency of fCD8s in each  
148 experimental group. This was followed by image analysis of fixed LN tissue samples  
149 from 9 donors (3 from each experimental group). Imaging studies were used to  
150 substantiate the flow data and to determine the localization of CD8<sup>+</sup> T cell subsets

151 within LNs in health and in HIV disease. A subset of 5 HIV infected participants (3 HIV  
152 treated and 2 untreated) were then selected based on sample availability and used for  
153 mechanistic studies to define epigenetic processes and transcriptional factors that  
154 regulate *CXCR5* gene expression in human CD8<sup>+</sup> T cells. Details of the experimental  
155 design and samples used for each sub study are summarized in the flowchart and  
156 cartoon depicted in **supplementary Fig. 1A and B**.

157

### 158 **Phenotypic characterization of fCD8s in HIV infected subjects**

159 Recently, fCD8s were described as tissue resident CD8<sup>+</sup> T cells (31). To assess  
160 whether CD8<sup>+</sup> T cells that have the follicular-homing phenotype (fCD8s) were indeed  
161 localized in the lymphoid tissues during HIV infection, we first used flow cytometry to  
162 measure the frequency of fCD8s in LN and in peripheral blood mononuclear cells  
163 (PBMCs) in all 3 study groups. Consistent with a recent study (31), we observed a  
164 significantly higher frequency of fCD8s in LN compared to PBMCs in all the groups  
165 ( $p < 0.0001$ ) (**Fig. 1A**).

166

167 We then evaluated the effect of HIV infection and viral antigen persistence on the  
168 induction of fCD8s in LNs, comparing participants in the FRESH cohort who were  
169 uninfected with subjects who were ART suppressed, as well as untreated donors. We  
170 observed a significantly higher frequency of fCD8s as a percentage of total CD8<sup>+</sup> T  
171 cells in treated ( $p = 0.01$ ) and untreated donors ( $p = 0.008$ ) compared to uninfected  
172 donors (**Fig. 1B**), and that ART limited the development of this phenotype ( $p = 0.003$ )  
173 (**Fig. 1B**). These data is consistent with previous studies that suggest persistent viral  
174 infection (16, 22) and/or inflammation (16) in ART-suppressed individuals drives the  
175 differentiation of fCD8s during HIV infection.

176 We next assessed if increased fCD8s in HIV treated and untreated individuals as  
177 compared to HIV negative individuals correlated with their localization in GCs using  
178 multicolour immunofluorescence microscopy and TissueQuest image analysis  
179 software. This technique allows simultaneous quantitative assessment of cellular  
180 phenotype and cell localization in tissues (30). We defined fCD8 as CXCR5<sup>+</sup>CD8<sup>+</sup> T  
181 cells. Active GCs were identified by BCL6<sup>+</sup> staining within B cell follicles. Image  
182 analysis readily revealed fCD8s localized in the GCs in HIV infected persons, in  
183 contrast to the lack of GC fCD8s in HIV negative persons (**Fig. 1C**). Notably, we  
184 observed a significant positive correlation between the density of fCD8s localized in  
185 GCs and the frequency of fCD8s measured by flow cytometry in treated and untreated  
186 HIV infection ( $r=0.87$ ,  $p=0.02$ ) (**Fig. 1C**), consistent with the notion that, viral infection  
187 stimulate proliferation of fCD8, which preferentially localize in GCs.

188

### 189 **Transcriptional and epigenetic factors are differentially expressed between** 190 **human fCD8s and GCTfh**

191 fCD8s are associated with HIV and tumour control (16, 18), but their differentiation  
192 conditions in humans are not known. Recent animal studies have defined the  
193 regulatory networks that govern the expression of CXCR5 in CD8<sup>+</sup> T cells (16, 17, 22,  
194 23). However, it is not clear if similar regulatory networks regulate CXCR5 expression  
195 in human CD8<sup>+</sup> T cells. To address this question, we performed bulk RNA-Seq on  
196 FACS-sorted cells from the excised LNs of five HIV infected individuals  
197 (**supplementary Fig 1A**). Five separate cell populations were FACS-sorted from each  
198 individual: bulk fCD8s (CD3<sup>+</sup>CD8<sup>+</sup>CD45RA<sup>-</sup>CXCR5<sup>+</sup>), non-fCD8s  
199 (CD3<sup>+</sup>CD8<sup>+</sup>CD45RA<sup>-</sup>CXCR5<sup>-</sup>), naïve CD8<sup>+</sup> T cells (CD3<sup>+</sup>CD8<sup>+</sup>CD45RA<sup>+</sup>CCR7<sup>+</sup>),  
200 GCTfh (CD3<sup>+</sup>CD4<sup>+</sup>CXCR5<sup>high</sup>PD1<sup>high</sup>) and non-Tfh (CD3<sup>+</sup>CD4<sup>+</sup>CXCR5<sup>-</sup>PD1<sup>-</sup>)



201 **(supplementary Fig. 1B)**. GCTfh, which constitutively express high levels of CXCR5,  
202 and naïve CD8<sup>+</sup> T cells, which do not express CXCR5, served as positive and negative  
203 controls, respectively. Non-Tfh was included as additional control to compare with  
204 GCTfh. Principal component analysis (PCA) of 5 biological replicates separated all  
205 experimental groups in two dimensional space based on quantification of mRNA  
206 transcripts **(Fig. 2A)**. Despite minimal separation of fCD8s and non-fCD8s, there were  
207 607 genes (FDR<0.1) that were differentially expressed between these two subsets  
208 **(supplementary data file)**.

209

210 We first analysed genes that have previously been implicated in CXCR5 regulatory  
211 circuitry in animal studies, beginning with BCL6, which has been described as the  
212 master regulator of CXCR5 gene expression in GCTfh and murine fCD8s (16, 22, 32,  
213 33). We found that BCL6 was highly expressed in GCTfh relative to fCD8s ( $p<0.00001$ )  
214 and non-Tfh ( $p=0.16$ ) **(Fig. 2B)**. Notably, there was no difference in BCL6 expression  
215 between fCD8s and non-fCD8s ( $p=0.64$ ) **(Fig. 2B)**, contrary to murine studies (16, 22).  
216 To determine if BCL6 expression levels correlate with protein levels, we measured  
217 BCL6 expression by flow cytometry. Consistent with the transcriptional analysis, BCL6  
218 expression was significantly lower in fCD8s compared to GCTfh ( $p<0.0001$ ) **(Fig. 2C)**.  
219 Together these data indicate a fundamental difference in transcriptional circuitry that  
220 regulate CXCR5 expression in follicular CD4<sup>+</sup> relative to CD8<sup>+</sup> T cells. The data also  
221 suggest that BCL6 may not be a critical regulator of CXCR5 expression in human  
222 CD8<sup>+</sup> T cells.

223

224 Next, we investigated other genes that were similarly expressed between fCD8s and  
225 GCTfh in mice, and were reported to be part of the CXCR5 transcription circuitry. They

226 include: *Id3*, *Id2*, *TCF7* (gene coding for *TCF-1*) and *PRDM1* (22). Again, contrary to  
227 what was reported LCMV mouse models (16, 22), *Id3* and *TCF7* were significantly  
228 downregulated in human fCD8s compared to GCTfh (*Id3*:  $p < 0.0001$ , *TCF-1*:  
229  $p < 0.0001$ ), with no apparent difference between fCD8s and non-fCD8s (*Id3*:  $p = 0.50$ ,  
230 *TCF-1*:  $p = 0.90$ ) (**Fig 2D**). Similarly, *Id2*, which is a negative regulator of *CXCR5*  
231 expression was significantly higher in fCD8s compared to GCTfh (*Id2*:  $p = 0.0005$ ).  
232 *PRDM1* that has been shown to antagonize GCTfh differentiation (32), was  
233 significantly higher in fCD8s compared to GCTfh ( $p = 0.01$ ) (**Fig. 2D**). Notably, *Id2* was  
234 significantly expressed between fCD8 and non-fCD8 but not *PRDM1* (*Id2*:  $p = 0.00001$ ,  
235 *PRDM1*:  $p = 0.83$ ). Together, these data suggest that the common transcriptional  
236 regulators of *CXCR5* expression in GCTfh and fCD8, described in murine studies, is  
237 true for human GCTfh but not fCD8s. These data suggest that an alternative  
238 transcription circuitry may be involved in regulating *CXCR5* expression in human CD8<sup>+</sup>  
239 T cells.

240

241 To gain further insight into the transcriptional mechanisms responsible for the *CXCR5*  
242 gene regulation in human CD8<sup>+</sup> T cells, we focused on the genes found to be  
243 differentially expressed between lymphoid fCD8s and non-fCD8s by RNA-Seq  
244 analysis. We identified 43 genes ( $\approx 7\%$  of differentially expressed genes,  $FDR < 0.1$ )  
245 that encode factors regulating epigenetic processes (epigenetic factors) such as  
246 chromatin remodelling, histone modification and DNA methylation (34) (**Fig. 2E and**  
247 **extended data in supplementary Fig. 2**). These data provided the first hint that  
248 specific epigenetic mechanisms maybe directly involved in regulating *CXCR5* in  
249 human CD8<sup>+</sup> T cells.

250

251 **The *CXCR5* gene locus is tightly regulated by DNA methylation and chromatin**  
252 **landscape in human lymphoid CD8<sup>+</sup> T cells**

253 Epigenetic regulators were among the most highly differentially expressed genes  
254 between fCD8s and non-fCD8s; thus, we hypothesized that distinct epigenetic  
255 mechanisms, such as changes to DNA methylation and/or chromatin landscape,  
256 regulate the expression of *CXCR5* in human CD8<sup>+</sup> T cells. To obtain experimental  
257 evidence to address this, we first measured DNA methylation levels proximal to  
258 *CXCR5* from the same cell populations used for RNA-Seq, using loci-specific bisulfite-  
259 treated DNA sequencing. We FACS-sorted GCTfh, fCD8s, non-fCD8s, and naïve  
260 CD8<sup>+</sup> T cells from LNs. We did not include non-Tfh in this experiment due to sample  
261 availability and that we could only FACS-sort 4 subsets at a time. We extracted DNA  
262 from 3 biological replicates for sequencing. DNA methylation levels were measured in  
263 CpG islands within 300 bp upstream to 200 bp downstream of the *CXCR5* TSS. We  
264 observed significantly higher methylation levels proximal to the *CXCR5* promoter  
265 region in naïve CD8<sup>+</sup> T cells (average methylation 88%), non-fCD8s (average  
266 methylation 69%). In contrast, fCD8s (average methylation 7%) and GCTfh (average  
267 methylation 6%) had minimal levels of methylation at equivalent sites (**Fig. 3A and B**).

268  
269 To determine if methylation was responsible for *CXCR5* gene silencing, we incubated  
270 FACS-sorted non-fCD8s with 10 $\mu$ M of 5'-aza-2-deoxycytidine (Aza), which inhibits the  
271 enzymatic activity of DNA methyl transferases (38). After 24 hours of incubation, we  
272 measured *CXCR5* mRNA transcript levels by digital droplet PCR (ddPCR). We found  
273 that Aza treatment significantly increased *CXCR5* mRNA levels ( $p=0.002$ ) (**Fig. 3C**).  
274 Together, these data suggest that *CXCR5* gene locus-specific DNA methylation is  
275 involved in repressing the *CXCR5* gene in human non-fCD8s.

276

277 In addition to showing that DNA methylation is likely involved in repressing *CXCR5*  
278 transcription, the RNA-Seq dataset revealed several other differentially expressed  
279 genes involved in epigenetic regulatory processes such as chromatin remodelling and  
280 histone modification. Thus, to gain comprehensive mechanistic insights into the  
281 epigenetic processes that regulate *CXCR5* gene expression in CD8<sup>+</sup> T cells, we used  
282 the Assay for Transposable-Accessible Chromatin using Sequencing (ATAC-Seq).  
283 This technology identifies genome wide accessible regions and can be used to identify  
284 transcription factor (TF) footprinting and nucleosomal positioning, all of which  
285 cooperatively regulate gene expression (39, 40). Briefly, ATAC-Seq analysis was  
286 performed on the DNA samples isolated from the same lymphoid cell populations used  
287 for RNA-Seq studies (**supplementary Fig. 1B**). We performed a PCA on the top 10%  
288 variably accessible regions, revealing clear delineation of cell subsets based on the  
289 chromatin accessibility profiles (**Fig. 3D and supplementary Fig. 3A**). We calculated  
290 a set of 66,514 open chromatin regions (OCRs) that appeared in at least one of the  
291 subsets. The subset separation was strikingly similar to the PCA plot for RNA-Seq  
292 data (**see Fig. 2A**), revealing significant overlap between accessibility and gene  
293 expression. Indeed, there was a strong association between chromatin accessibility  
294 and gene expression between fCD8s and non-fCD8s ( $R^2= 0.54$ ) (**supplementary Fig.**  
295 **3B**).

296

297 Next, we profiled accessibility of the *CXCR5* gene, revealing a closed chromatin  
298 conformation at the TSS of the *CXCR5* gene in non-fCD8s, naïve CD8<sup>+</sup> T cells and  
299 non-Tfh. In contrast, fCD8s and GCTfh had open chromatin conformation at the  
300 equivalent site (**Fig. 3E**). These data confirm that chromatin accessibility also

301 contributes to the repressed state of the *CXCR5* gene in non-fCD8s and naïve CD8<sup>+</sup>  
302 T cells. The observed DNA methylation and closed chromatin structure of the *CXCR5*  
303 TSS are consistent with the notion that DNA methylation promotes nucleation of  
304 repressed chromatin structure encompassing the *CXCR5* gene region (27, 41).

305

306 To identify epigenetic factors that may directly regulate chromatin accessibility of the  
307 *CXCR5* gene, we next performed a TF binding motif search around the *CXCR5* TSS.  
308 We restricted the motif search to regions that were inputted to have TF footprints  
309 proximal to the TSS (42, 43). Our analysis revealed that fCD8s and GCTfh shared  
310 binding motifs at the *CXCR5* gene TSS for several epigenetic regulatory proteins,  
311 namely Pit-Oct-Unc (POU) family: POU2F3, POU3F1, POU3F3, E2F6, and ZNF384  
312 (**Fig. 4A**). Given that POU-TFs function as pioneer factors that interact with the  
313 closed chromatin at enhancer and/or promoter regions to open up regions for  
314 transcriptional activities (25, 44-46), and the fact that POU2F3, POU3F1 and POU3F3  
315 binding sites were observed for both fCD8s and GCTfh, these data suggest that these  
316 three pioneer factors may be directly involved in opening the chromatin structure at  
317 the *CXCR5* TSS.

318

319 We next looked for TF binding sites upstream of the *CXCR5* TSS. ATAC-seq analysis  
320 identified two peaks upstream of the *CXCR5* TSS, likely representing enhancer  
321 regions which we labelled U1 (-6.5kb), and U2 (-11kb) (**supplementary Fig. 4A**). We  
322 performed a TF motif search within these regions for each subset to identify specific  
323 TFs that bind in this region and found that MAF was highly enriched in fCD8s and  
324 GCTfh, while TGIF1 and TGIF2 were enriched in fCD8s but not in GCTfh (**Fig. 4B**).  
325 Together, these data suggest that POU epigenetic pioneering factors mediate the

326 opening of chromatin around the *CXCR5* TSS and that MAF, TGIF1 and TGIF2 are  
327 key TFs in *CXCR5* expression in human CD8<sup>+</sup> T cells.

328

329 **Weighted Gene Correlated Network Analysis (WGCNA) reveals alternative**  
330 **pathway involved in the expression of *CXCR5* in human CD8<sup>+</sup> T cells**

331 Cell differentiation involves complex interplay between transcription factors that  
332 progressively dictate their phenotype and function. To identify molecular circuitry that  
333 regulate *CXCR5* gene expression in human CD8<sup>+</sup> T cells, we performed Weighted  
334 Gene Correlated Network Analysis (WGCNA) on the ATAC-Seq and RNA-Seq data  
335 sets. WGCNA is a network analysis that is used to identify modules of highly co-  
336 expressed genes using RNA-Seq data (47) or chromatin-accessible gene networks  
337 using ATAC-Seq data (48, 49). The program assigns a identifier to each module as  
338 an identification mark. We first applied this network analysis on the ATAC-Seq data to  
339 identify chromatin accessibility networks that cooperatively regulate *CXCR5* gene  
340 accessibility. We hypothesized that the mechanisms governing chromatin accessibility  
341 may not act on open chromatin regions (OCRs) in isolation, but rather are grouped  
342 into programs that change the accessibility of multiple chromatin loci.

343

344 We performed WGCNA on 12,000 ATAC-Seq peaks after excluding sites with high  
345 technical variance and retaining regions proximal to genes that were differentially  
346 expressed. Interestingly, we observed that the *CXCR5* TSS and U2 OCRs were both  
347 assigned by WGCNA to module 5 (**Fig. 5A**). These data suggest that the U2 (enhancer  
348 region) interacts with the TSS to promote *CXCR5* transcription. Notably, enrichment  
349 analysis on module 5 revealed striking similarity in accessibility pattern between fCD8s  
350 and GCTfh (**Fig. 5B**), despite the clear difference in overall genome-wide accessibility

351 between the two cell subsets as depicted in ATAC-Seq PCA plot (**Fig. 3D**).  
352 Importantly, these data identify regions that regulate *CXCR5* gene accessibility that  
353 are shared between fCD8s and GCTfh.

354

355 Having identified gene accessible regions that are potentially involved in *CXCR5*  
356 accessibility in both fCD8s and GCTfh at DNA level, we next performed WGCNA  
357 analysis on the RNA-Seq data to define *CXCR5* gene regulation at mRNA level. We  
358 constructed WGCNA networks using the four cell subsets and 20,987 genes  
359 sufficiently expressed in fCD8s and non-fCD8s. The resultant network consisted of 91  
360 modules, each containing a set of highly co-expressed genes. We batch normalized  
361 the data to account for heterogeneity of expression between participants and used the  
362 expression values to calculate gene set enrichment analysis (GSEA) for each subset  
363 for the 91 detected modules. We observed a significant enrichment of *CXCR5*, *MAF*,  
364 *Id3*, *POU3F1* and *CXCL13* genes in module 2, which was shared by fCD8s and GCTfh  
365 (**Fig. 5C**). Importantly, ATAC-Seq data identified motifs from footprints for the same  
366 set of genes as ATAC-Seq data in U2 and TSS regions of the *CXCR5* gene (**Fig. 4B**;  
367 **supplementary Fig. 4A**). Notably, GSEA demonstrated significant enrichment of  
368 GCTfh and fCD8s subsets in module 2 (**Fig. 5D**). Gene ontology (GO) analysis on the  
369 *CXCR5*-centric module 2 showed enrichment of terms associated with “cell migration”  
370 (**Fig. 5E**), suggesting that a subset of genes governing the expression of *CXCR5* in  
371 human CD8<sup>+</sup> T cells are intricately involved in cell migration. Collectively, our data  
372 identify *MAF*, *Id3* and *POU3F1* as key genes involved in driving the expression of  
373 *CXCR5* in human CD8<sup>+</sup> T cells.

374

375 Based on the experimental and computational data presented in this study, we  
376 propose the following model for the expression of CXCR5 on human CD8<sup>+</sup> T cells in  
377 lymphoid tissues; T cell receptor (TCR) stimulation of lymphoid tissue naïve CD8<sup>+</sup> T  
378 cells leads to a stepwise chromatin plasticity driven by pioneering factor (POU3F1)  
379 and DNA demethylation that cooperatively open up chromatin at the CXCR5 TSS and  
380 promoter region. Chromatin relaxation allows the recruitment of transcriptional  
381 machinery including *MAF*, *Id3*, *TGIF1*, *TGIF2* and *CXCL13* that drive the expression  
382 of CXCR5 (see details of the proposed model in **supplementary Fig. 5**).

383

384

### 385 **Low CXCR5 expression on fCD8s impacts their migratory capacity to the** 386 **germinal centers**

387 We next investigated the observed lower expression of CXCR5 in fCD8s relative to  
388 GCTfh, which is thought to attenuate their migratory capacity into B cell follicles (20,  
389 50). We first compared CXCR5 protein expression levels and found significantly higher  
390 expression in GCTfh compared to fCD8s ( $p=0.0001$ ) (**Fig. 6A**), consistent with  
391 previous reports (29). This was true for mRNA levels as well (**Fig. 6B**). We then  
392 performed a trans-well experiment to assess if expression of CXCR5 affects the rate  
393 of fCD8s chemotaxis towards a CXCL13 gradient. Indeed, fCD8s exhibited  
394 significantly lower chemotaxis capacity compared to GCTfh ( $p=0.0001$ ) (**Fig. 6C**).  
395 Moreover, a GO analysis on the RNA-Seq data showed enrichment of genes  
396 associated with cell migration/leukocyte migration in fCD8s relative to non-fCD8s (**Fig.**  
397 **6D**). Together, these data confirm that lower expression of CXCR5 reduces  
398 chemotaxis capacity of fCD8s towards CXCL13.

399



## 400 **Reduced turnover rate of the nucleosome at the promoter region of *CXCR5***

401 Next, we investigated the molecular basis of low *CXCR5* expression on fCD8s. Given  
402 high frequency of methylated CpG islands in the *CXCR5* gene, which tend to attract  
403 nucleosomes (27, 51), we evaluated nucleosomal occupancy at the TSS. We  
404 hypothesized that nucleosome positioning and occupancy around the TSS would  
405 interfere with the transcriptional machinery resulting in mitigated gene expression (52).  
406 To test this, we used the NucleoATAC tool (53) to impute the presence of  
407 nucleosomes in and around the *CXCR5* gene. Interestingly, the presence of  
408 nucleosomes was imputed in both fCD8s and GCTfh at the TSS. However,  
409 nucleoATAC revealed higher nucleosomal occupancy in predicted TF footprint regions  
410 around the TSS in fCD8s, whereas GCTfh exhibited less nucleosomal occupancy in  
411 the same region (**Fig. 6E**). Computationally, the nucleosomal occupancy was  
412 calculated for a wider range upstream of the TSS in GCTfh than fCD8s (blue and red  
413 dotted lines), which extended beyond the point where a nucleosome may occupy TF  
414 binding regions (black dashed line) (**Fig. 6E**), suggesting that positioning of  
415 nucleosome at the TSS may interfere with optimal transcription of *CXCR5* in fCD8.  
416 Given that nucleosome occupancy results in the enrichment of reads with longer insert  
417 sizes in the ATAC-Seq data, typically greater than 147 bp. We used this knowledge  
418 as a proxy for nucleosomal occupancy and performed a Fisher's exact test to compare  
419 longer to shorter read ratio over the imputed dyad of the TSS nucleosome (53). We  
420 found that the ratio of longer to shorter reads were 2.38 times what was calculated for  
421 GCTfh ( $p=0.012$ ). Collectively, these data suggest higher nucleosomal occupancy in  
422 fCD8s compared to GCTfh at the TSS region. Computational simulation of  
423 nucleosomal occupancy confirmed the notion that nucleosomal occupancy interferes

424 with transcriptional machinery, reducing the transcription of the *CXCR5* gene in fCD8s  
425 **(supplementary Fig. 6A and B).**

426

427

## 428 **Discussion**

429 Understanding regulation of CD8<sup>+</sup> T cell trafficking to B cell follicles has far reaching  
430 implications for developing strategies to eradicate HIV infected cells in B cell follicles  
431 and to treat B cell derived malignancies. This study set out to address two key  
432 questions. First, we investigated why the majority of CD8<sup>+</sup> T cells that reside in LNs  
433 do not express CXCR5, the chemokine receptor required for cellular trafficking into LN  
434 follicular areas. Second, we interrogated the molecular mechanisms that regulate  
435 differential levels of CXCR5 expression on fCD8s relative to GCTfh.

436

437 To answer the first question, we studied two antigen-experienced CD8<sup>+</sup> T cell subsets  
438 termed fCD8s and non-fCD8s that were phenotypically matched except for the  
439 expression of CXCR5 on the cell surface. Locus-specific bisulfite-treated sequencing  
440 and genome-wide chromatin accessibility data identified DNA-hypermethylation and  
441 closed chromatin structure as two epigenetic mechanisms that are involved in  
442 repressing CXCR5 expression in human non-fCD8s.

443

444 For the second question, we focused the analysis on CXCR5<sup>+</sup> subsets, fCD8s and  
445 GCTfh, because of the significant difference in the levels of CXCR5 expression and  
446 trafficking kinetics between the two subsets. We showed that fCD8s had reduced  
447 CXCR5 expression compared to GCTfh, and were less efficient at trafficking towards

448 CXCL13 chemokine. Importantly, we identified marked differences in nucleosomal  
449 occupancy and positioning between these two subsets, suggesting a plausible  
450 mechanism moderating the expression of CXCR5 in fCD8s. Taken together, our data  
451 show that CXCR5 expression in CD8<sup>+</sup> T cells is tightly controlled by at least three key  
452 epigenetic mechanisms: DNA methylation, chromatin structure and nucleosomal  
453 occupancy.

454

455 Conceptualization of this study was motivated by three studies in mice that recently  
456 described a subset of CXCR5 expressing CD8<sup>+</sup> T cells termed fCD8s because of their  
457 ability to accumulate in B cells follicles (16, 17, 22). Strikingly, the murine models  
458 showed that the transcriptional profile of fCD8s looks similar to that of GCTfh but not  
459 non-fCD8s. More importantly, the murine studies showed that following lymphocytic  
460 choriomeningitis virus (LCMV) infection, fCD8s readily accumulated in B cell follicles  
461 and were able to eradicate infected GCTfh (16, 17, 22). A subsequent rhesus  
462 macaque study showed similar results (23). Thus, we asked if fCD8s were also  
463 increased in HIV infection in human LNs and if their differentiation profile was similar  
464 to that described in mice. Indeed, our data show increased frequency of fCD8s in LN  
465 of HIV infected individuals compared to uninfected individuals. Initiation of antiviral  
466 therapy mitigated the fCD8s differentiation, suggesting that fCD8s induction is antigen  
467 driven, as described in animal studies (20). Increase fCD8s is probably not unique to  
468 HIV-1 infection but rather a more generalized immune response to viral infection in  
469 LNs.

470

471 Given that murine studies identified several TFs that were common between fCD8s  
472 and GCTfh, including BCL6, Id3, Id2, PRDM1 and TCF-1 (16, 17, 22, 32, 54), we

473 investigated whether similar TFs were operating in human LN CD8<sup>+</sup> T cells in the  
474 setting of HIV infection. We sorted LN fCD8s and non-fCD8s from HIV infected  
475 individuals using sorting panels based on similar markers used in murine studies.  
476 RNA-Seq analysis showed that TF expression profiles in human GCTfh cells were  
477 similar to those reported in mice (22). In contrast to the murine studies, we found  
478 significant differences in TF expression profiles between human GCTfh and fCD8s. In  
479 fact, our data show that TF expression profiles in human fCD8s were more similar to  
480 non-fCD8s than GCTfh. This indicates that most of the TFs that are critical for fCD8  
481 differentiation in mice might not be essential for human fCD8 differentiation. Taken  
482 together, these results suggest that other mechanisms may regulate CXCR5  
483 expression in human CD8<sup>+</sup> T cells.

484

485 Our RNA-Seq data indicate that epigenetic mechanisms play a major role in *CXCR5*  
486 gene regulation. Locus-specific bisulfite-treated sequencing revealed  
487 hypermethylation in CpG islands proximal to promoter regions of subsets that lack  
488 CXCR5 expression (non-fCD8s and naïve CD8<sup>+</sup> T cells) and reduced methylation  
489 levels in CXCR5 positive cells (fCD8s and GCTfh). Moreover, inhibition of enzymatic  
490 activity of methyltransferase using aza treatment increased CXCR5 expression in  
491 CXCR5 negative cells, thus, providing compelling evidence that DNA methylation is a  
492 major epigenetic mechanism involved in silencing CXCR5 expression (36). ATAC-Seq  
493 data revealed closed chromatin conformation at the CXCR5 TSS in non-fCD8s. It is a  
494 well-known phenomenon that DNA methylation increases nucleosome compaction  
495 and rigidity (41), therefore, greater DNA methylation is the probable cause of the  
496 observed condensed chromatin at the CXCR5 TSS and the corollary silencing of the  
497 *CXCR5* gene in non-fCD8s.

498

499 To identify key genes and pathways involved in *CXCR5* gene regulation, we performed  
500 WGCNA on the ATAC-Seq and RNA-Seq data. This allowed us to identify circuits of  
501 correlated chromatin accessibility as well as gene expression. WGCNA analysis  
502 identified modules of highly correlated open chromatin regions which indicates  
503 chromatin accessibility of the *CXCR5* promoter region is part of a larger epigenetic  
504 circuit. We identified an important module that contains TSS and U2 peaks (a putative  
505 enhancer region). Strikingly, this module was highly enriched in both fCD8s and GCTfh  
506 which suggest that similar epigenetic circuitry shared between fCD8s and GCTfh in  
507 the context of regulation *CXCR5* gene accessibility. Furthermore, we used WGCNA  
508 to identify transcriptional modules that govern the expression of *CXCR5* in human  
509 CD8<sup>+</sup> T cells. From this analysis arose a module containing *CXCR5*, *MAF*, *Id3*,  
510 *POU3F1* and *CXCL13* which was enriched for fCD8s and GCTfh. GSEA on this  
511 module confirms a stepwise significance of genes skewed for GCTfh, followed by  
512 fCD8s, further implicating different regulatory pathway for *CXCR5* expression in  
513 human CD8<sup>+</sup> T cells. Indeed, GO analysis of this module clearly demonstrated  
514 chemotaxis and B cell migration as the key modules common to the two cell subsets.  
515 This implies that the transcriptional factors governing the expression of *CXCR5* in  
516 human CD8<sup>+</sup> T cells, such as *Id3*, *MAF* and *POU3F1*, were mostly contained in the  
517 same module.

518

519 Having identified the epigenetic processes that repress *CXCR5* expression on non-  
520 fCD8s, we next focused on investigating molecular mechanisms that mitigate the  
521 expression of *CXCR5* on fCD8s. Flow cytometry data and *in vitro* chemotaxis  
522 experiments suggest that lower expression level of *CXCR5* in fCD8s contributes to the

523 inefficient infiltration of B cell follicles observed in our imaging experiments.  
524 Importantly, we identified nucleosomal occupancy as a plausible molecular  
525 mechanism that likely lowers CXCR5 expression in fCD8s. We observed significant  
526 differential nucleosomal positioning at the TSS of fCD8s relative to GCTfh which  
527 suggests nucleosomal positioning as a plausible molecular mechanism.

528

529 A notable limitation of this study is that we could not profile the histone modification  
530 pattern around the *CXCR5* gene in fCD8s and non-fCD8s, due to insufficient sample  
531 availability for ChIP-Seq. Nonetheless, ChIP-Seq data in a B cell line that expresses  
532 higher levels of CXCR5 shows H3K4me2, which denotes open chromatin within the  
533 accessible regions around the *CXCR5* gene (GM12787 ([ENCODE Project Consortium](#)  
534 [2012](#))), consistent with our findings.

535

536 In conclusion, our data provide evidence of key epigenetic and transcriptional  
537 processes that intricately orchestrate the regulation of the *CXCR5* gene in human  
538 CD8<sup>+</sup> T cells. Importantly, we identified a putative transcription circuitry that includes  
539 Id3, MAF and POU3F1, along with epigenetic mechanisms including DNA methylation,  
540 chromatin structure and nucleosomal occupancy as potential targets for inducing  
541 CXCR5 expression on human CD8<sup>+</sup> T cells. Manipulation of these processes has the  
542 potential to enhance trafficking of CD8<sup>+</sup> T cells to B cell follicles where they are needed  
543 to eradicate HIV infected cells or cancerous cells.

544

## 545 **Materials and methods**

546

### 547 **Human samples**

548 Fresh human inguinal lymph nodes (LNs) were obtained from participants enrolled at  
549 the Prince Memorial Mshiyeni Hospital, Umlazi township, Durban, South Africa.  
550 Demographic and clinical characteristics of the study participants are summarized in  
551 **Table 1**. A section of the excised LN was processed for tissue imaging and the  
552 remaining section was meshed to isolate lymph node mononuclear cells (LNMCs).  
553 LNs were homogenized using a syringe plunger and passed through a cell strainer  
554 (BD Biosciences Germany) to make a single-cell suspension. Mononuclear cells were  
555 isolated using RPMI medium (Sigma-Aldrich, St. Louis, MO) containing 10% heat-  
556 inactivated fetal calf serum (R10 medium). Extracted LNMCs were frozen for  
557 downstream experiments. All protocols were approved by the Biomedical Research  
558 Ethics Committee of the University of KwaZulu-Natal and the Massachusetts General  
559 Hospital Institutional Review Board.

560

### 561 **Flow cytometry and cell sorting**

562 For phenotypic characterization, cells were surface stained with cell-viability dye  
563 (Fixable Blue dead cell stain kit, Invitrogen), followed by anti-CD3-BV711 (BioLegend),  
564 anti-CD4-BV650 (BD Biosciences), anti-CD8-BV786 (BD Biosciences), anti-PD-1-  
565 BV421 (BioLegend), anti-CXCR5-AF488 (BD Biosciences), anti-CD45RA-A700  
566 (BioLegend), anti-CCR7-PerCPcy5.5 (BioLegend).

567

568 All cells were sorted for ATC-Seq and RNA-Seq using a BD FACSAria. Gating  
569 strategies for sorted subsets were as follows: fCD8<sup>+</sup>; CD3<sup>+</sup>CD4<sup>-</sup>CD8<sup>+</sup>CD45RA<sup>-</sup>  
570 CXCR5<sup>+</sup>, non-fCD8<sup>+</sup>; CD3<sup>+</sup>CD4<sup>-</sup>CD8<sup>+</sup>CD45RA<sup>-</sup>CXCR5<sup>-</sup>, Naïve CD8<sup>+</sup> T cells;  
571 CD3<sup>+</sup>CD4<sup>-</sup>CD8<sup>+</sup>CD45RA<sup>+</sup>CCR7<sup>+</sup>, GCTfh; CD3<sup>+</sup>CD4<sup>+</sup>CD8<sup>-</sup>PD-1<sup>high</sup>CXCR5<sup>high</sup>, non-  
572 Tfh; CD3<sup>+</sup>CD4<sup>+</sup>CD8<sup>-</sup>PD-1<sup>-</sup>CXCR5<sup>-</sup>. For RNA-Seq, cell subsets were sorted in RLT

573 buffer (Invitrogen) containing 1% beta-mercaptoethanol. For ATAC-Seq, cell subsets  
574 were sorted in PBS containing 5% fetal calf serum (FCS) for downstream processing.  
575 In all sorting experiments, the grade purity on the sorted cells was >95%.

576

### 577 **Immunofluorescence staining**

578 Localization of CD8<sup>+</sup> T cell subsets was assessed as described by (6). Briefly, slides  
579 were prepared from 4  $\mu$ m sections of paraffin-embedded tissue blocks and  
580 immunostained using in-house optimized protocols. For each LN, serial sections were  
581 stained singly with antibodies against BCL6 and CD8 and a DAB DAB visualization kit  
582 (Envision Double Stain system, Dako; USA) for bright field microscopy. Alternatively,  
583 we used the Opal 4-Color Fluorescent IHC Kit (PerkinElmer, USA) for  
584 immunofluorescence microscopy light. Slides were mounted and viewed using the  
585 Axio observer and TissueFAXS imaging software (TissueGnostics). Quantitative  
586 imaging analysis was conducted with TissueQuest (TissueGnostics). Medians of the  
587 cell density in the scanned GCs were used to perform statistical analysis.

588

### 589 **DNA methylation and drug treatment assays**

590 Specific CpG within the *CXCR5* gene region was measured for DNA methylation  
591 according to a protocol from Paulin et al., (55). Briefly, a minimum of 500 ng of genomic  
592 DNA was bisulfite treated and amplified using a primer designed to cover 500 bp  
593 around the TSS. Amplified product was then analysed using Agena MassArray  
594 platform.

595 Drug treatment was then performed on the same samples used for DNA methylation  
596 assay. Briefly, an average of 100,000 non-fCD8s were sorted from the lymph node  
597 tissues and treated for 24 hrs with 10  $\mu$ M of 5'-aza-2-deoxycytidine; a drug that inhibits



598 the activity of genome-wide methyl-transferases. Thereafter, cells were washed, lysed  
599 and RNA were extracted and purified. cDNA was generated from the purified RNA  
600 using (Bio-Rad). CXCR5 mRNA transcripts were then measured from the generated  
601 cDNA using digital droplet PCR (ddPCR).

602

### 603 **Chemotaxis assay**

604 Chemotaxis assays were performed as previously described (56). Briefly, LNMCs  
605 were suspended at a density of  $1 \times 10^6$  in RPMI 1640 medium containing L-glutamine,  
606 antibiotics, 10 mM HEPES buffer and 0.5% fatty acid-free BSA. Cells were cultured  
607 for 30-60 min at 37°C before being plated in trans-well inserts with a pore size of 5  $\mu$ m  
608 and a diameter of 6.5 mm in 24-well plates (Corning Costar). 100  $\mu$ l cells ( $1 \times 10^6$ )  
609 were added to the upper wells and 580  $\mu$ l diluted CXCL13 chemokine (Peprotech) at  
610 50 ng/ml was placed in the bottom wells, and plates were incubated for 3 hours at  
611 37°C in 5% CO<sub>2</sub>. Migrated cells were stained with viability dye, CD3, CD4, CD8,  
612 CXCR5, and PD-1, and counted using flow cytometry.

613

### 614 **ATAC-Seq**

615 Library preparations were performed as described by (39). Briefly, an average of  
616 20,000 cells was sorted from LNs for fCD8s, non-fCD8s, naïve CD8<sup>+</sup> T cells, GCTfh  
617 and non-Tfh. Five biological replicates were sorted for each subset. Sorted cells were  
618 lysed using lysis buffer (10mM Tris-HCL, pH 7.4, 10mM NaCl, 3mM MgCl<sub>2</sub>, 0.1%  
619 IGEPAL CA-630). Lysed cells were treated with 2.5  $\mu$ l of Tn5 Transposase (Illumina,  
620 San Diego, CA) suspended in 50  $\mu$ l of 1X TD buffer for 30 minutes at 37°C. Thereafter,  
621 transposed DNA was purified using QiaQuick MiniElute columns (Qiagen, Valencia,  
622 CA). Purified transposed DNA was amplified by PCR using Nextera barcoded primers

623 (Illumina, San Diego, CA) and NEBNext High-Fidelity 2X PCR Master mix (New  
624 England Biolabs) with 12 cycles. Barcoded amplified libraries were purified using  
625 QiaQuick MiniElute columns (Qiagen, Valencia, CA) and quantified with KAPA real-  
626 time library quantification kit (KAPA, Wilmington, Massachusetts). Paired-end  
627 sequencing was performed on the high throughput NextSeq 500 (Illumina, San Diego,  
628 CA). Raw data from sequencer were stored in an on-site database and is available  
629 on request.

630

### 631 **RNA-Seq**

632 An average of 20,000 cells were sorted directly into lysis (RLT) buffer (Qiagen,  
633 Valencia, CA) for RNA-Seq. Subsets that were sorted are: fCD8s, non-fCD8s, naïve  
634 CD8<sup>+</sup> T cells, GCTfh and non-Tfh. Five biological replicates were used to perform this  
635 experiment. Total RNA was isolated from lysed cells using Qiagen RNeasy Mini  
636 columns (Qiagen, Valencia, CA) according to the manufacturer's instructions. Purified  
637 RNA was evaluated with BioAnalyzer RNA pico kit (Agilent Technologies Inc, Santa  
638 Clara, CA). Messenger RNA (mRNA) was isolated from total RNA using NEBNext  
639 oligo dT beads (New England Biolabs). Isolated mRNA was fragmented and thereafter  
640 reverse transcribed to cDNA using NEBNext ultra RNA library preparation kit (New  
641 England Biolabs). The cDNA products were purified using AmpureXP beads  
642 (Beckman Coulter, Danvers, MA) and indexed using NEBNext multiplex oligo (New  
643 England Biolabs). Size distribution was evaluated using Agilent high-sensitivity DNA  
644 chip and initial quantification was performed using Qubit dsDNA high sensitive kit  
645 (ThermoFisher Scientist, Waltham, MA) and the median obtained on the TapeStation  
646 (Agilent Technologies Inc). KAPA kit was used for final quantification of obtained cDNA  
647 libraries molarity for sequencing. Index libraries were pooled and sequenced using

648 high throughput NextSeq 500 (Illumina, San Diego, CA). Raw data from sequencer  
649 was stored in an on-site database and is available on request.

650

### 651 **Statistical analysis**

652 Statistical analyses were conducted using Prism software, version 6.0 (GraphPad,  
653 Inc.). Two-tailed tests were employed, and p-values less than 0.05 were considered  
654 significant. Analysis on the next generation sequencing data is described in the  
655 Bioinformatics analysis below.

656

### 657 **ATAC-Seq analysis**

658 To detect open chromatin regions (OCR) ATAC-seq Illumina reads were first filtered  
659 and trimmed for quality using TrimGalore and passed through the Kundaje lab pipeline  
660 (57) that performed the necessary quality controls (filtering of duplicate reads,  
661 removing reads mapping to the mitochondria) and peak detection together with  
662 irreproducible discovery rate (IDR) analysis using the biological replicates for each cell  
663 type. A cutoff of 0.1 was chosen for IDR. An optimal set of peaks that was produced  
664 for each cell type by the Kundaje pipeline was used for downstream analysis. OCR  
665 regions were compared between cell types using the DiffBind and EdgeR (58). A cut-  
666 off of 0.05 was chosen for FDR. We calculated the differential OCR using only the cell  
667 subsets as contrasts and subsequently paired the samples according to the patient  
668 from which the cells were extracted. The second method proved to be more sensitive  
669 at the same FDR of 0.05. PCA was performed using the top 1000 OCR by variance.  
670 The same sites were also used to construct a heatmap using the dba.heatMap  
671 function. Peak regions were annotated with the annotatePeak function from the  
672 ChIPseeker package (59). Annotations further than 50kb upstream from the TSS or

673 those 10kb beyond the 3'-end of the gene were excluded. Gene ontology (GO) term  
674 enrichment was calculated with the `enrichGO` function from `clusterProfiler` (59).

675

## 676 **RNA-Seq analysis**

677 RNA-Seq short reads were quantified using Kallisto (60). The Ensembl version 85  
678 (GRCh37) was used as a transcriptome reference. Options were included to correct  
679 for "GC bias" and bootstrap sampling of 100. The Sleuth R package was used for  
680 downstream quantification and differential expression analysis (61). Gene transcripts  
681 were aggregated to gene level using internal sleuth functions. When doing pairwise  
682 comparisons (e.g. fCD8 vs non-fCD8), the design matrix was constructed in a way  
683 that would take the natural variation of expression data between subjects into account.  
684 Thus, the reduced design formula took the shape of  $\sim pid$ , while the full model  $\sim pid +$   
685 *condition*, where *pid* refers to the patient id and *condition* refers to the cell type. The  
686 likelihood ratio test (LRT) of Sleuth was used to determine differential expression of  
687 genes by determining whether the *condition* variable added significant contribution in  
688 explaining the count data. Additionally, to determine the effect size of differential gene  
689 expression, the beta value for the *condition* variable was used as a proxy for log-fold  
690 differences in gene expression between conditions. For visualization purposes, the  
691 batch effects introduced by individual patients were removed using the `removeBatch`  
692 `Effects` function of the R package `limma`. Functional enrichment was determined using  
693 both the `enrichGO` and `gseGO` functions of the `clusterProfiler` package.

694

## 695 **Transcription factor footprinting and enrichment**

696 Wellington-bootstrap was used for footprint detection (43). To increase sensitivity of  
697 footprint prediction, aligned reads in the form of BAM files were merged for each cell

698 type: fCD8, non-fCD8, Naive CD8<sup>+</sup>T cells, GCTfh. For the HIV-Specific cell sets, reads  
699 were not merged to determine HIV-Specific footprinting sets. Predicted footprints were  
700 extended by 5 bp at each end and TF matching was performed using RGT (62). We  
701 used both the HOCOMOCO (63) and JASPAR (64) databases to complement  
702 mutually exclusive transcription factors from each set, e.g. *Id2* is not included in  
703 JASPAR, but is included in HOCOMOCO. Predicted footprints were filtered if they  
704 were more than 50 kilobases upstream from the transcription start site. Transcription  
705 factors that did not have evidence of expression from the RNA-Seq data were also  
706 filtered. We determined TF enrichment by comparing the frequency of predicted TF  
707 motifs in footprints compared to a background random set generated by RGT using a  
708 Fisher exact test. FDR values were determined using the R package *qvalue* (65) and  
709 a cut-off of 0.01 was used to filter out non-significant hits. We contrasted subjects for  
710 differential enrichment of TF motifs detected within the predicted footprints. We used  
711 the Wellington Bootstrap method (42) to detect differential footprints that can indicate  
712 higher activity of a transcription factor at different footprint loci. Differential footprints  
713 were chosen on the criteria of having a score >8 as produced by the  
714 *wellington\_bootstrap.py* script or if a footprint was exclusively detected in a condition.

715

716 We calculated the differentially enriched TF motifs between all the cell types, i.e. fCD8,  
717 non-fCD8, Naive CD8<sup>+</sup> T cells, GCTfh, and each of the HIV-Specific sets, yielding 27  
718 comparisons. For the fCD8 and non-fCD8 subsets, we compared the enrichment of  
719 TF footprints between up and down regulated genes. This was done for both the  
720 predicted footprints from the whole set as well as the footprints demonstrating  
721 differential signal produced by Wellington bootstrap. For the wellington bootstrap,

722 relative frequencies of TF motifs were calculated. We then clustered these relative  
723 frequencies and displayed them as a heatmap.

724

725 Plots for the footprints were generated based on the average Tn5 insertion sites 200bp  
726 around the predicted footprinting sites. Because Tn5 does have cleavage bias, the  
727 counts were corrected using the *tracks* module of the RGT-HINT package. Additional  
728 plots were generated for differential footprints.

729

### 730 **Weighted correlation network analysis**

731 We tested the modularity of gene expression using weighted correlation network  
732 analysis (WGCNA) (47). For the RNA-Seq data, raw count data was first regularized  
733 with the variance stabilizing transformation (vst) function from DESeq2 (66). WGCNA  
734 is sensitive to the amount of available data for network construction. We therefore  
735 included Naive CD8<sup>+</sup> T cells, non-fCD8, fCD8, and GCTfh and a set of HIV specific  
736 samples (blood and LN) to augment our network for both the expression network  
737 (RNA-Seq data) as well as the chromatin accessibility network (ATAC-Seq data). After  
738 construction of the gene expression network, GSEA was performed to determine the  
739 level of enrichment of a module in a subset. For this, the data were adjusted to account  
740 for batch effects. For each gene, a Z-score was calculated and sorted and used as  
741 input for the GSEA and the results visualized.

742

743 To determine whether there are modules of OCR specific to expressed genes, a  
744 WGCNA network for the OCR regions from the ATAC-Seq data was constructed. We  
745 used the read counts from the merged peaks calculated by DiffBind as input and also  
746 regularized the input with variance stabilizing transformation. We hypothesized that

747 while OCR in and around genes would be largely correlated, certain OCRs may be in  
748 different modules depending on the subset. To test this, we assigned all the OCRs to  
749 modules and then used the OCR annotation as a gene reference. We specifically  
750 looked at genes that are differentially expressed in fCD8 and GCTfh compared to non-  
751 fCD8 and cross-referenced this with the ATAC-Seq WGCNA network modules.  
752 Similarly to the WGCNA for RNA-Seq, we performed GSEA using batch adjusted  
753 count data and calculated a Z-score for each subset, ranked these values and used  
754 them as input for GSEA.

755

### 756 **Nucleosomal Positioning**

757 NucleoATAC (67) was used to predict nucleosome occupancy and position from the  
758 ATAC-Seq data. For each subset, MACS 2 was used with the *--broadPeak* option to  
759 localize regions for nucleosomal detection. These regions were further expanded by  
760 200bp on either end. To improve signal, samples reads were merged within each  
761 subset.

762

763 To investigate differences in nucleosomal positioning within the promoter region of  
764 CXCR5 between GCTfh and fCD8, the region matching the promoter of TSS was  
765 successively trimmed from the 3' end. With each successive trim, NucleoATAC was  
766 again run on that region to calculate nucleosomal occupancy signals and positions.  
767 This trimming should bias the removed shorter reads and reveal temporal positioning  
768 of the nucleosome. Importantly, the fragment size distribution files and V-matrix files  
769 produced from the full peakset was used as input to eliminate fragment distribution  
770 bias, produce a BED file containing these overlapping regions. The smoothed signal

771 was plotted and the combined position file was used for dyad positioning of the  
772 nucleosome.

773

#### 774 **Acknowledgements**

775 We thank our study participants, the laboratory staff at the HIV Pathogenesis  
776 Programme and the clinic staff at the Prince Mshiyeni Hospital, Durban, South Africa.

777 We also thank Professor John E. Wherry, John L. Johnson and Sasikanth Manne at  
778 the Institute of Immunology, Philadelphia, PA, USA for training on ATAC-Seq and  
779 technical guidance on data analysis. Additionally, we thank Dr. Erica Andersen-Nissen  
780 and Professor Julie McElrath at the HIV Vaccine Trial Network (HVTN), Cape Town  
781 for access to the HVTN sequencing platform. We thank Dr. Daniel Muema for technical  
782 support on RNA-Seq library generation.

783

#### 784 **Author contributions**

785 ZMN conceived the project. ZNM and FJO designed the experiments. IJ and JP and  
786 ThanNg performed the lymph node biopsies. TNK processed the lymph node samples.  
787 FJO performed majority of the experiments described in this study under the  
788 supervision of ZMN with technical assistance from VR on drug treatment assay. OOB  
789 perform tissue staining and analysis with technical support from TRK. DNA  
790 methylation assay using bi-sulfite treatment and sequencing was performed by  
791 Inquaba Biotec. FJO and AFN performed the next generation sequencing (NGS). WS  
792 performed NGS analysis (ATAC-Seq and RNA-Seq) under the supervision of TO. FJO  
793 analysed other data reported in this study. FJO, WS and ZMN wrote the manuscript.  
794 ZMN, BDW and TN provided critical edits to the manuscript. All authors reviewed the  
795 manuscript.



796

## 797 **Funding Statement**

798 We acknowledge the following funding sources; HHMI International Research Scholar  
799 Award #55008743 (ZMN), The US National Institute of Health (NIAID) (R01AI145305  
800 to ZMN; R37 AI67073 to BDW), Dan and Marjorie Sullivan Research Scholar Award  
801 Grant #224910 to ZMN. Additional funding was provided by the Mark and Lisa  
802 Schwartz Foundation, the Bill and Melinda Gates Foundation, the International AIDS  
803 Vaccine Initiative (UKZNRSA1001) and the Victor Daitz Foundation. This work was  
804 further supported by Sub-Saharan African Network for TB/HIV Research Excellence  
805 (SANTHE), a DELTAS Africa Initiative (grant # DEL-15-006) provided a Doctoral  
806 fellowship to FJO (2016-2020). The DELTAS Africa Initiative is an independent  
807 funding scheme of the African Academy of Sciences (AAS)'s Alliance for Accelerating  
808 Excellence in Science in Africa (AESA) and supported by the New Partnership for  
809 Africa's Development Planning and Coordinating Agency (NEPAD Agency) with  
810 funding from the Wellcome Trust (grant # 107752/Z/15/Z) and the UK government.  
811 The views expressed in this publication are those of the author(s) and not necessarily  
812 those of AAS, NEPAD Agency, Wellcome Trust or the UK government.

813

## 814 **Competing interests**

815 The authors declare no conflict of interest.

816

## 817 **Corresponding authors**

818 Address correspondence to Zaza M Ndhlovu

819

## 820 **Figure legends**

821

822 **Figure 1: Phenotypic characterization of fCD8s in LN in HIV-1 infection (A)** Paired  
823 comparative analysis of the % frequency of fCD8s (CD8<sup>+</sup>CXCR5<sup>+</sup>) in lymph node (LN)  
824 and peripheral blood (PB) of 17 participants comprises of 5 untreated, 7 treated and 5  
825 HIV negative individuals. Analysis shows a significantly magnitude of fCD8s in LN  
826 compared to PB. **(B)** Comparative analysis of HIV treated and untreated groups with  
827 HIV negative group showing a significant increase in fCD8s in HIV infected groups.  
828 **(C)** LN imaging showing the density of fCD8s within the germinal centre (GC).  
829 Correlation analysis showing significant positive correlation between the frequency of  
830 fCD8s measured by flow cytometry with the density of fCD8s in GCs quantified by  
831 imaging of fixed tissue (TissueQuest) in HIV treated and untreated groups.

832

833 **Figure 2: Lower expression of *BCL6* in fCD8s compared to GCTfh (A)** Principal  
834 component analysis of the RNA-Seq data from the four cell subsets, colour labelled  
835 according to cell subset. The top 500 genes by variance were used to construct the  
836 PCA plot. Clear separations are observed between the subsets with the fCD8s and  
837 non-fCD8s subsets showing closest proximity. **(B)** Statistical analysis showing  
838 significant greater magnitude *BCL6* expression in GCTfh compared to fCD8s and no  
839 difference between fCD8s and non-fCD8s. **(C)** Statistical analysis showing significant  
840 increase of *BCL6* mean fluorescence intensity (MFI) in GCTfh compared with fCD8s  
841 and non-fCD8s. **(D)** Expression values of CXCR5 regulating genes. Batch and patient  
842 corrected transcripts per million (TPM) values for selected genes previously shown to  
843 be involved in the regulation of CXCR5 expression. FDR values are obtained from the  
844 differential expression analysis using the sleuth package in the R statistical  
845 environment. **(E)** Ranked expression of selected epigenetic modifiers. Epigenetic

846 modifiers were grouped according to functional attributes, i.e. chromatin remodeling,  
847 histone chaperone, histone modification and by transcription activity. Genes were  
848 ranked from highest (red) to lowest (blue) expression. Each column represents the  
849 expression level for a particular patient as labelled on the x-axis.

850

851 **Figure 3: Epigenetic regulation of CXCR5 expression (A)** Quantitative  
852 measurement of DNA methylation levels within specific cell subsets; GCTfh, fCD8s,  
853 Non-fCD8s and Naïve-CD8<sup>+</sup> T cells were determined using the EpiTYPER® DNA  
854 Methylation Analysis. Methylation levels were measured from bi-sulfite treated  
855 genomic DNA, followed by PCR amplification of a 500bp fragment containing 15 CpG  
856 sites (red letters). The naïve- and non-fCD8s cells show higher levels of methylation  
857 within several sites (darker circles), while the GCTfh and fCD8s show lower levels of  
858 methylation (lighter circles), suggesting DNA methylation interference with *CXCR5*  
859 gene transcription. The position of CpG sites are represented relative to the  
860 transcription start site (TSS). **(B)** Percentage levels of methylation are depicted in bar  
861 graph for each subset analyzed across the 15 CpG sites. **(C)** Non-fCD8s were FAC-  
862 sorted and treated for 24 hours with 10 $\mu$ M 5-aza-2'-deoxycytidine (Aza drug), a DNA  
863 methyltransferase inhibitor that causes hypomethylation of DNA. Fold change relative  
864 to the B2M house keeping control indicated significant increase in the *CXCR5*  
865 expression levels after treatment, indicating DNA methylation as potential mechanism  
866 limiting transcription of *CXCR5* gene. **(D)** PCA plots obtained from the ATAC-Seq cut  
867 count data. The top 10% of ATAC-Seq peaks (merged between subsets) by variance  
868 were used to create the PCA plot. **(E)** Overview of the ATAC-Seq signal around the  
869 *CXCR5* gene loci. ATAC-Seq signal is shown for different marked (in grey) loci where

870 differential binding was detected in at least one sample. The black box shows the TSS  
871 region where there is clear equivalence between fCD8s and GCTfh ATAC-Seq  
872 signals, while very low signal was observed for both non-fCD8s and naive CD8<sup>+</sup> T  
873 cells.

874

875 **Figure 4: Shared and unique transcriptional factor footprint proximal to the**  
876 ***CXCR5* gene (A)** Footprints in selected regions predicted footprinted regions  
877 respective cell subsets. The pie charts show the relative Wellington bootstrap scores  
878 for each subset against all others acting as a proxy for the relative TF activity observed  
879 in that region. The bars indicate the extent of the predicted TF footprint, with colours  
880 assigned to each subset. Footprints with unassigned TFs are also included. **(B)**  
881 Assignment of TF to subsets. Enrichment of TF motifs (restricted differential imputed  
882 footprints between subsets) of each subset is depicted in the heatmap. The TFs are  
883 sorted in ascending order of importance through the signal ratio in the fCD8 subset.

884

885 **Figure 5: Regulatory pathways influencing *CXCR5* expression (A)** The top figure  
886 shows the OCR regions observed in at least one of the cell subsets. Peaks are either  
887 prefixed with U to indicate upstream, or D to indicate downstream of the *CXCR5*  
888 TSS. The colours represent the WGCNA modules. Module names appear at peak  
889 regions. ATAC-Seq WGCNA around the *CXCR5* gene region. Modules are sized  
890 according to enrichment and significance. The highlighted module 5 contains both the  
891 TSS of *CXCR5* and the U2 region. **(B)** Gene set enrichment analysis (GSEA) plot of  
892 the module 5 of ATAC-Seq WGCNA enrichment values. Peaks belonging to the  
893 module 5 for each subset are plotted according to the rank within each subset. High

894 correspondence and enrichment are seen for the GCTfh and fCD8s subsets, while no  
895 enrichment is shown for non-fCD8s and negative enrichment is shown for naïve CD8<sup>+</sup>  
896 T cells. **(C)** Overview of the RNA-Seq WGNCA modules. Selected modules are shown.  
897 The modules are named according to their GSEA score. Positive values indicate  
898 positive enrichment. The size of the module corresponds to the -log P-value. The panel  
899 to the right indicates the number of genes that are up-regulated in fCD8 and non-fCD8  
900 for each module. **(D)** GSEA analysis shows the overall enrichment of the CXCR5  
901 containing in module 2, with corresponding enrichment scores and significance  
902 values. The bottom bar shows the concentration of genes within a subset according  
903 to the rank of expression. **(E)** GO enrichment of the module 2 showing positive  
904 enriched GO terms in the module 2 ranked according to significance. Cell migration is  
905 an important factor in the module 2.

906

907 **Figure 6: CXCR5 expression level on fCD8s impacts their migration to the**  
908 **germinal centers (A)** Mean fluorescence intensity (MFI) of CXCR5 on fCD8s and  
909 GCTfh shows significant increase in the expression of CXCR5 on GCTfh compared to  
910 fCD8s. **(B)** RNA-Seq expression values of CXCR5 showing the batch-normalized  
911 expression values in different cell subsets. **(C)** Relative migration of GCTfh, fCD8s  
912 and non-fCD8s subsets in response to CXCL13; a ligand for CXCR5. Graph shows  
913 the number of cells that migrated in each subset after 3 hours **(D)** The GSEA plot of  
914 GO terms between fCD8s and non-fCD8s Cell migration and Leukocyte migration  
915 shows the ranked differential expression of genes belonging to these terms between  
916 the fCD8s and non-fCD8s subsets. **(E)** The figure depicts the nucleosomal occupancy  
917 scores (top line plot) and the nucleosomal signal (bottom heatmap) as produced by  
918 NucleoATAC around the TSS region of CXCR5 in fCD8 (red) and GCTfh (blue)

919 subsets. The colored vertical dashed lines show the range of predicted nucleosomal  
920 occupancy. The thin dashed line shows the approximate location of the nucleosomal  
921 dyad where the nucleosome will occlude the TSS region. Height of the occupancy  
922 score shows the fraction of nucleosomal sized fragments at the chromosome 11  
923 position. Predicted transcription factor footprints are shown as bars for the respective  
924 cell subsets. The heatmap shows the calculated nucleosomal signal from the ATAC-  
925 Seq data and shows a higher degree of nucleosomal translocation in the 5' direction  
926 in GCTfh compared to fCD8s.

927 **Supplementary data**

928 **Supplementary Figure 1A and B:** Study samples and experimental design for  
929 flowcytometry, tissue imaging ATAC-Seq, RNA-Seq and DNA methylation.  
930 Experimental setup describing cell subsets and markers used in cell sorting.

931

932 **Supplementary Figure 2:** Heatmap of up-regulated genes with epigenetic function in  
933 fCD8. The heatmap shows the relative rank of gene expression (after batch-  
934 adjustment) of the epigenetic genes. Majority of the genes are involved in histone  
935 modification as shown in the heatmap.

936

937 **Supplementary Figure 3: (A)** The heatmap shows a condensed overview of ATAC-  
938 Seq signal of the top 10% ATAC-Seq peaks by variance. The clusters are organized  
939 in a hierarchical fashion showing subset specific clusters. **(B)** The figure shows  
940 differentially expressed genes with corresponding differential accessibility OCRs  
941 proximal to the gene. The y-axis represents the  $\log_2$  fold change in gene expression,  
942 while the x-axis represents the log fold change in chromatin accessibility. A regularized  
943 regression line is fitted to the data. Example genes are annotated. The gene of  
944 interest, *CXCR5* is coloured in red.

945

946 **Supplementary Figure 4: (A)** We determined the top TF enriched using WB for each  
947 subset and plotted the results on pie chart. ATAC-Seq peaks 11kb from the TSS region  
948 of *CXCR5* ATAC seq peaks within 11kb of the TSS of *CXCR5* are shown. The boxes

949 indicate the named upstream regions, i.e. U1 (-6.5kb) and U2 (-11kb). **(B)** Set  
950 enrichment of TF. We ranked ATAC-Seq signals of OCRs within the module 5 with the  
951 representative *eigengene* of the module 5. Regions were sorted in descending order  
952 depending on their correlation with the module 5. For each subset, we used the  
953 calculated TF footprints in each region and determined by *set enrichment analysis*  
954 whether these TFs were likely enriched in regions higher correlated with the module 5  
955 eigengene. That is, we hypothesize TF showing higher SEA enrichment with the  
956 module 5 eigengene to be more associated with the hub regions that are purported to  
957 be central in governing accessibility programs across this module. TF were  
958 aggregated at family level. From the figures, it becomes apparent that there is a  
959 progressive enrichment of MAF-family related factors from non-fCD8s to the  
960 enrichment of pioneering POU-family transcription factors in fCD8s with *GCTfh*  
961 sharing these *TFs*. High enrichment is shown as positive (red) values, while negative  
962 enrichment (i.e. TF depleted module 5 OCRs) are shown in blue.

963

964 **Supplementary Figure 5:** Based on experimental and computational evidence  
965 generated in this study, we propose that in naïve CD8<sup>+</sup> T cells, DNA methylation of  
966 CpG islands around the TSS stably silence *CXCR5* gene expression by attracting  
967 chromatin remodelling proteins and histone modifiers to the loci which compact  
968 chromatin around the TSS into heterochromatin state. Cell division following TCR  
969 stimulation results in partial chromatin relaxation and passive DNA demethylation around  
970 the promoter region allowing for basal transcriptional activity observed in non-fCD8s  
971 relative to naïve CD8<sup>+</sup> T cells. As the cells continue to divide, a small proportion of  
972 cells become more extensively demethylated at the *CXCR5* gene loci and gradually  
973 accumulate epigenetic regulatory proteins including pioneer factors (the POU),



974 namely POU3F3 and POU3F1 which are recruited to the TSS proximal regions. These  
975 factors decondense the chromatin at the TSS thereby exposing unmethylated DNA for  
976 transcription, thus allowing the transcription machinery to bind and transcribe the  
977 *CXCR5* gene.

978

979 **Supplementary Figure 6: (A)** The animation (left) is a cartoon showing hypothesized

980 translocation events in the TSS region of *CXCR5*. This figure was generated from

981 data produced by NucleoATAC. At each iteration, short reads were progressively

982 removed from the 3'→5' end and a new nucleosomal signal generated by

983 NucleoATAC. We observe a shift in nucleosomal positioning in both fCD8s (red) and

984 GCTfh (blue), but a more pronounced depletion of nucleosomal signal close to the

985 TSS of *CXCR5* and subsequently a higher peak further upstream, whereas

986 nucleosomal occupancy is determined to be mostly proximal to the TSS in fCD8s. On

987 the right, a ARToon model is drawn depicting average counts of *CXCR5* transcripts

988 produced by each cell subset, with GCTfh quickly outpacing fCD8s. **(B)** Nucleosomal

989 positioning can dictate transcription efficiency. We postulate that fCD8s have less

990 *CXCR5* expression relative to GCTfh due to higher nucleosomal occupancy around

991 the *CXCR5* TSS. The rationale is as follows, although, we detected primary

992 nucleosomal signal over the TSS in both fCD8s and GCTfh, the secondary

993 nucleosomal signal is closer to the TSS in fCD8s but further upstream in GCTfh. This

994 suggest that the repositioning of the nucleosome further away from the TSS, in GCTfh,  
995 makes it easier for the transcriptional machinery to access the promoter and initiate  
996 transcription. Nucleosomes are pushed away from gene promoter regions by a family  
997 of proteins called nucleosomal remodellers. Some remodellers are more efficient at  
998 evicting nucleosomes from active gene loci than others (68). Interestingly, fCD8s and  
999 GCTfh express different types of nucleosomal remodellers. Therefore, we postulate  
1000 that nucleosomal remodellers in GCTfh are more efficient at pushing the nucleosome  
1001 further upstream, which completely uncovers the CXCR5 TSS for transcription  
1002 whereas, fCD8s nucleosomal remodellers are less efficient at pushing the nucleosome  
1003 away from the TSS, hence the attenuated CXCR5 gene expression.

1004

1005 **Supplementary data file:** List of differentially expressed genes between fCD8s and  
1006 non-fCD8s. Top 285 genes highlighted in red are upregulated in fCD8s while the  
1007 bottom 322 genes highlighted in green are downregulated in fCD8s compared to non-  
1008 fCD8s.

1009

## 1010 **References**

1011

- 1012 1. Luster AD, Alon R, von Andrian UH. Immune cell migration in inflammation: present  
1013 and future therapeutic targets. *Nature immunology*. 2005;6(12):1182-90.
- 1014 2. Pantaleo G, Graziosi C, Demarest JF, Butini L, Montroni M, Fox CH, et al. HIV  
1015 infection is active and progressive in lymphoid tissue during the clinically latent stage of  
1016 disease. *Nature*. 1993;362(6418):355-8.
- 1017 3. Folkvord JM, Armon C, Connick E. Lymphoid follicles are sites of heightened human  
1018 immunodeficiency virus type 1 (HIV-1) replication and reduced antiretroviral effector  
1019 mechanisms. *AIDS research and human retroviruses*. 2005;21(5):363-70.
- 1020 4. Horiike M, Iwami S, Kodama M, Sato A, Watanabe Y, Yasui M, et al. Lymph nodes  
1021 harbor viral reservoirs that cause rebound of plasma viremia in SIV-infected macaques upon  
1022 cessation of combined antiretroviral therapy. *Virology*. 2012;423(2):107-18.
- 1023 5. Perreau M, Savoye AL, De Crignis E, Corpataux JM, Cubas R, Haddad EK, et al.  
1024 Follicular helper T cells serve as the major CD4 T cell compartment for HIV-1 infection,  
1025 replication, and production. *The Journal of experimental medicine*. 2013;210(1):143-56.

- 1026 6. Banga R, Procopio FA, Noto A, Pollakis G, Cavassini M, Ohmiti K, et al. PD-1(+) and  
1027 follicular helper T cells are responsible for persistent HIV-1 transcription in treated aviremic  
1028 individuals. *Nature medicine*. 2016;22(7):754-61.
- 1029 7. Kohler SL, Pham MN, Folkvord JM, Arends T, Miller SM, Miles B, et al. Germinal  
1030 Center T Follicular Helper Cells Are Highly Permissive to HIV-1 and Alter Their Phenotype  
1031 during Virus Replication. *Journal of immunology (Baltimore, Md : 1950)*. 2016;196(6):2711-  
1032 22.
- 1033 8. Cyster JG. Chemokines and cell migration in secondary lymphoid organs. *Science*  
1034 (New York, NY). 1999;286(5447):2098-102.
- 1035 9. Moser B, Ebert L. Lymphocyte traffic control by chemokines: follicular B helper T  
1036 cells. *Immunology letters*. 2003;85(2):105-12.
- 1037 10. Hansell CA, Simpson CV, Nibbs RJ. Chemokine sequestration by atypical chemokine  
1038 receptors. *Biochemical Society transactions*. 2006;34(Pt 6):1009-13.
- 1039 11. Connick E, Mattila T, Folkvord JM, Schlichtemeier R, Meditz AL, Ray MG, et al. CTL  
1040 fail to accumulate at sites of HIV-1 replication in lymphoid tissue. *J Immunol*.  
1041 2007;178(11):6975-83.
- 1042 12. Fukazawa Y, Lum R, Okoye AA, Park H, Matsuda K, Bae JY, et al. B cell follicle  
1043 sanctuary permits persistent productive simian immunodeficiency virus infection in elite  
1044 controllers. *Nature medicine*. 2015;21(2):132-9.
- 1045 13. Streeck H. AIDS virus seeks refuge in B cell follicles. *Nature medicine*.  
1046 2015;21(2):111-2.
- 1047 14. Velu V, Mylvaganam G, Ibegbu C, Amara RR. Tfh1 Cells in Germinal Centers During  
1048 Chronic HIV/SIV Infection. *Frontiers in immunology*. 2018;9:1272.
- 1049 15. Joyce JA, Fearon DT. T cell exclusion, immune privilege, and the tumor  
1050 microenvironment. *Science (New York, NY)*. 2015;348(6230):74-80.
- 1051 16. Leong YA, Chen Y, Ong HS, Wu D, Man K, Deleage C, et al. CXCR5(+) follicular  
1052 cytotoxic T cells control viral infection in B cell follicles. *Nat Immunol*. 2016;17(10):1187-96.
- 1053 17. He R, Hou S, Liu C, Zhang A, Bai Q, Han M, et al. Follicular CXCR5- expressing  
1054 CD8(+) T cells curtail chronic viral infection. *Nature*. 2016;537(7620):412-28.
- 1055 18. Chu F, Li HS, Liu X, Cao J, Ma W, Ma Y, et al. CXCR5(+)CD8(+) T cells are a distinct  
1056 functional subset with an antitumor activity. *Leukemia*. 2019.
- 1057 19. Reuter MA, Del Rio Estrada PM, Buggert M, Petrovas C, Ferrando-Martinez S,  
1058 Nguyen S, et al. HIV-Specific CD8(+) T Cells Exhibit Reduced and Differentially Regulated  
1059 Cytolytic Activity in Lymphoid Tissue. *Cell reports*. 2017;21(12):3458-70.
- 1060 20. Petrovas C, Ferrando-Martinez S, Gerner MY, Casazza JP, Pegu A, Deleage C, et al.  
1061 Follicular CD8 T cells accumulate in HIV infection and can kill infected cells in vitro via  
1062 bispecific antibodies. *Science translational medicine*. 2017;9(373).
- 1063 21. Armitage JO, Weisenburger DD. New approach to classifying non-Hodgkin's  
1064 lymphomas: clinical features of the major histologic subtypes. Non-Hodgkin's Lymphoma  
1065 Classification Project. *Journal of clinical oncology : official journal of the American Society*  
1066 *of Clinical Oncology*. 1998;16(8):2780-95.
- 1067 22. Im SJ, Hashimoto M, Gerner MY, Lee J, Kissick HT, Burger MC, et al. Defining CD8+  
1068 T cells that provide the proliferative burst after PD-1 therapy. *Nature*. 2016;537(7620):417-21.
- 1069 23. Mylvaganam GH, Rios D, Abdelaal HM, Iyer S, Sharp G, Mavigner M, et al. Dynamics  
1070 of SIV-specific CXCR5+ CD8 T cells during chronic SIV infection. *Proceedings of the*  
1071 *National Academy of Sciences of the United States of America*. 2017;114(8):1976-81.
- 1072 24. Henning AN, Roychoudhuri R, Restifo NP. Epigenetic control of CD8(+) T cell  
1073 differentiation. *Nature reviews Immunology*. 2018;18(5):340-56.
- 1074 25. Iwafuchi-Doi M, Zaret KS. Pioneer transcription factors in cell reprogramming. *Genes*  
1075 *& development*. 2014;28(24):2679-92.

- 1076 26. Yu B, Zhang K, Milner JJ, Toma C, Chen R, Scott-Browne JP, et al. Erratum:  
1077 Epigenetic landscapes reveal transcription factors that regulate CD8(+) T cell differentiation.  
1078 *Nature immunology*. 2017;18(6):705.
- 1079 27. Collings CK, Anderson JN. Links between DNA methylation and nucleosome  
1080 occupancy in the human genome. *Epigenetics & chromatin*. 2017;10:18.
- 1081 28. Dong KL, Moodley A, Kwon DS, Ghebremichael MS, Dong M, Ismail N, et al.  
1082 Detection and treatment of Fiebig stage I HIV-1 infection in young at-risk women in South  
1083 Africa: a prospective cohort study. *The lancet HIV*. 2018;5(1):e35-e44.
- 1084 29. Ferrando-Martinez S, Moysi E, Pegu A, Andrews S, Nganou Makamdop K, Ambrozak  
1085 D, et al. Accumulation of follicular CD8+ T cells in pathogenic SIV infection. *The Journal of*  
1086 *clinical investigation*. 2018;128(5):2089-103.
- 1087 30. Gerner MY, Kastenmuller W, Ifrim I, Kabat J, Germain RN. Histo-cytometry: a method  
1088 for highly multiplex quantitative tissue imaging analysis applied to dendritic cell subset  
1089 microanatomy in lymph nodes. *Immunity*. 2012;37(2):364-76.
- 1090 31. Buggert M, Nguyen S, Salgado-Montes de Oca G, Bengsch B, Darko S, Ransier A, et  
1091 al. Identification and characterization of HIV-specific resident memory CD8(+) T cells in  
1092 human lymphoid tissue. *Science immunology*. 2018;3(24).
- 1093 32. Johnston RJ, Poholek AC, DiToro D, Yusuf I, Eto D, Barnett B, et al. Bcl6 and Blimp-1  
1094 are reciprocal and antagonistic regulators of T follicular helper cell differentiation. *Science*  
1095 (New York, NY). 2009;325(5943):1006-10.
- 1096 33. Nurieva RI, Chung Y, Martinez GJ, Yang XO, Tanaka S, Matskevitch TD, et al. Bcl6  
1097 mediates the development of T follicular helper cells. *Science (New York, NY)*.  
1098 2009;325(5943):1001-5.
- 1099 34. Medvedeva YA, Lennartsson A, Ehsani R, Kulakovskiy IV, Vorontsov IE, Panahandeh  
1100 P, et al. EpiFactors: a comprehensive database of human epigenetic factors and complexes.  
1101 *Database : the journal of biological databases and curation*. 2015;2015:bav067.
- 1102 35. Litterst CM, Kliem S, Marilley D, Pfitzner E. NCoA-1/SRC-1 is an essential  
1103 coactivator of STAT5 that binds to the FDL motif in the alpha-helical region of the STAT5  
1104 transactivation domain. *The Journal of biological chemistry*. 2003;278(46):45340-51.
- 1105 36. Han X, Gui B, Xiong C, Zhao L, Liang J, Sun L, et al. Destabilizing LSD1 by Jade-2  
1106 promotes neurogenesis: an antibraking system in neural development. *Molecular cell*.  
1107 2014;55(3):482-94.
- 1108 37. Batista IAA, Helguero LA. Biological processes and signal transduction pathways  
1109 regulated by the protein methyltransferase SETD7 and their significance in cancer. *Signal*  
1110 *transduction and targeted therapy*. 2018;3:19.
- 1111 38. Yang J, Tian X, Yang J, Cui J, Jiang S, Shi R, et al. 5-Aza-2'-deoxycytidine, a DNA  
1112 methylation inhibitor, induces cytotoxicity, cell cycle dynamics and alters expression of DNA  
1113 methyltransferase 1 and 3A in mouse hippocampus-derived neuronal HT22 cells. *Journal of*  
1114 *toxicology and environmental health Part A*. 2017;80(22):1222-9.
- 1115 39. Buenrostro JD, Giresi PG, Zaba LC, Chang HY, Greenleaf WJ. Transposition of native  
1116 chromatin for fast and sensitive epigenomic profiling of open chromatin, DNA-binding  
1117 proteins and nucleosome position. *Nature methods*. 2013;10(12):1213-8.
- 1118 40. Winter DR, Jung S, Amit I. Making the case for chromatin profiling: a new tool to  
1119 investigate the immune-regulatory landscape. *Nature reviews Immunology*. 2015;15(9):585-  
1120 94.
- 1121 41. Choy JS, Wei S, Lee JY, Tan S, Chu S, Lee TH. DNA methylation increases  
1122 nucleosome compaction and rigidity. *Journal of the American Chemical Society*.  
1123 2010;132(6):1782-3.

- 1124 42. Piper J, Assi SA, Cauchy P, Ladroue C, Cockerill PN, Bonifer C, et al. Wellington-  
1125 bootstrap: differential DNase-seq footprinting identifies cell-type determining transcription  
1126 factors. *BMC genomics*. 2015;16:1000.
- 1127 43. Piper J, Elze MC, Cauchy P, Cockerill PN, Bonifer C, Ott S. Wellington: a novel  
1128 method for the accurate identification of digital genomic footprints from DNase-seq data.  
1129 *Nucleic acids research*. 2013;41(21):e201.
- 1130 44. Lee MT, Bonneau AR, Takacs CM, Bazzini AA, DiVito KR, Fleming ES, et al. Nanog,  
1131 Pou5f1 and SoxB1 activate zygotic gene expression during the maternal-to-zygotic transition.  
1132 *Nature*. 2013;503(7476):360-4.
- 1133 45. Leichsenring M, Maes J, Mossner R, Driever W, Onichtchouk D. Pou5f1 transcription  
1134 factor controls zygotic gene activation in vertebrates. *Science (New York, NY)*.  
1135 2013;341(6149):1005-9.
- 1136 46. Iwafuchi-Doi M. The mechanistic basis for chromatin regulation by pioneer  
1137 transcription factors. *Wiley interdisciplinary reviews Systems biology and medicine*.  
1138 2019;11(1):e1427.
- 1139 47. Langfelder P, Horvath S. WGCNA: an R package for weighted correlation network  
1140 analysis. *BMC bioinformatics*. 2008;9:559.
- 1141 48. Miraldi ER, Pokrovskii M, Watters A, Castro DM, De Veaux N, Hall JA, et al.  
1142 Leveraging chromatin accessibility for transcriptional regulatory network inference in T Helper  
1143 17 Cells. *Genome research*. 2019;29(3):449-63.
- 1144 49. Li P, Leonard WJ. Chromatin Accessibility and Interactions in the Transcriptional  
1145 Regulation of T Cells. *Frontiers in immunology*. 2018;9:2738.
- 1146 50. Yu D, Ye L. A Portrait of CXCR5(+) Follicular Cytotoxic CD8(+) T cells. *Trends in*  
1147 *immunology*. 2018;39(12):965-79.
- 1148 51. Lovkvist C, Sneppen K, Haerter JO. Exploring the Link between Nucleosome  
1149 Occupancy and DNA Methylation. *Frontiers in genetics*. 2017;8:232.
- 1150 52. Svensson JP, Shukla M, Menendez-Benito V, Norman-Axelsson U, Audergon P, Sinha  
1151 I, et al. A nucleosome turnover map reveals that the stability of histone H4 Lys20 methylation  
1152 depends on histone recycling in transcribed chromatin. *Genome research*. 2015;25(6):872-83.
- 1153 53. Schep AN, Buenrostro JD, Denny SK, Schwartz K, Sherlock G, Greenleaf WJ.  
1154 Structured nucleosome fingerprints enable high-resolution mapping of chromatin architecture  
1155 within regulatory regions. *Genome research*. 2015;25(11):1757-70.
- 1156 54. Benezra R, Davis RL, Lockshon D, Turner DL, Weintraub H. The protein Id: a negative  
1157 regulator of helix-loop-helix DNA binding proteins. *Cell*. 1990;61(1):49-59.
- 1158 55. Paulin R, Grigg GW, Davey MW, Piper AA. Urea improves efficiency of bisulphite-  
1159 mediated sequencing of 5'-methylcytosine in genomic DNA. *Nucleic acids research*.  
1160 1998;26(21):5009-10.
- 1161 56. Allen CD, Ansel KM, Low C, Lesley R, Tamamura H, Fujii N, et al. Germinal center  
1162 dark and light zone organization is mediated by CXCR4 and CXCR5. *Nature immunology*.  
1163 2004;5(9):943-52.
- 1164 57. Sloan CA, Chan ET, Davidson JM, Malladi VS, Strattan JS, Hitz BC, et al. ENCODE  
1165 data at the ENCODE portal. *Nucleic acids research*. 2016;44(D1):D726-32.
- 1166 58. Robinson MD, McCarthy DJ, Smyth GK. edgeR: a Bioconductor package for  
1167 differential expression analysis of digital gene expression data. *Bioinformatics (Oxford,*  
1168 *England)*. 2010;26(1):139-40.
- 1169 59. Yu G, Wang LG, He QY. ChIPseeker: an R/Bioconductor package for ChIP peak  
1170 annotation, comparison and visualization. *Bioinformatics (Oxford, England)*.  
1171 2015;31(14):2382-3.
- 1172 60. Bray NL, Pimentel H, Melsted P, Pachter L. Near-optimal probabilistic RNA-seq  
1173 quantification. *Nature biotechnology*. 2016;34(5):525-7.

- 1174 61. Pimentel H, Bray NL, Puente S, Melsted P, Pachter L. Differential analysis of RNA-  
1175 seq incorporating quantification uncertainty. *Nature methods*. 2017;14(7):687-90.
- 1176 62. Gusmao EG, Allhoff M, Zenke M, Costa IG. Analysis of computational footprinting  
1177 methods for DNase sequencing experiments. *Nature methods*. 2016;13(4):303-9.
- 1178 63. Kulakovskiy IV, Vorontsov IE, Yevshin IS, Sharipov RN, Fedorova AD, Rumynskiy  
1179 EI, et al. HOCOMOCO: towards a complete collection of transcription factor binding models  
1180 for human and mouse via large-scale ChIP-Seq analysis. *Nucleic acids research*.  
1181 2018;46(D1):D252-d9.
- 1182 64. Khan A, Fornes O, Stigliani A, Gheorghe M, Castro-Mondragon JA, van der Lee R, et  
1183 al. JASPAR 2018: update of the open-access database of transcription factor binding profiles  
1184 and its web framework. *Nucleic acids research*. 2018;46(D1):D1284.
- 1185 65. Storey JD, Tibshirani R. Statistical significance for genomewide studies. *Proceedings*  
1186 *of the National Academy of Sciences of the United States of America*. 2003;100(16):9440-5.
- 1187 66. Love MI, Huber W, Anders S. Moderated estimation of fold change and dispersion for  
1188 RNA-seq data with DESeq2. *Genome biology*. 2014;15(12):550.
- 1189 67. Schep AN, Wu B, Buenrostro JD, Greenleaf WJ. chromVAR: inferring transcription-  
1190 factor-associated accessibility from single-cell epigenomic data. *Nature methods*.  
1191 2017;14(10):975-8.
- 1192 68. Barisic D, Stadler MB, Iurlaro M, Schubeler D. Mammalian ISWI and SWI/SNF  
1193 selectively mediate binding of distinct transcription factors. *Nature*. 2019;569(7754):136-40.  
1194

1195

1196

1197

**Table 1. Demographic and clinical characteristics of the study participants**

| Participants                               | HIV Negative                 | HIV Treated                    | HIV Untreated                      |
|--------------------------------------------|------------------------------|--------------------------------|------------------------------------|
| n                                          | 5                            | 7                              | 5                                  |
| Female                                     | 5                            | 7                              | 5                                  |
| Age                                        | 21<br>(20.5-22) <sup>a</sup> | 26<br>(23-36) <sup>a</sup>     | 23<br>(18-26) <sup>a</sup>         |
| CD4 counts,<br>cells/mm <sup>3</sup>       | N/A                          | 642<br>(401-1189) <sup>a</sup> | 436<br>(355-718) <sup>a</sup>      |
| Viral load<br>RNA copies/ml                | N/A                          | ≤20                            | 15068<br>(1200-23000) <sup>a</sup> |
| Time to LN excision<br>after HIV infection | N/A                          | >1year                         | >1year                             |

<sup>a</sup> Values expressed as median (interquartile range)

N/A: not applicable

bioRxiv preprint doi: <https://doi.org/10.1101/2020.07.17.208470>; this version posted July 17, 2020. The copyright holder for this preprint (which was not certified by peer review) is the author/funder. This article is a US Government work. It is not subject to copyright under 17 USC 105 and is also made available for use under a CC0 license.

Figure 1

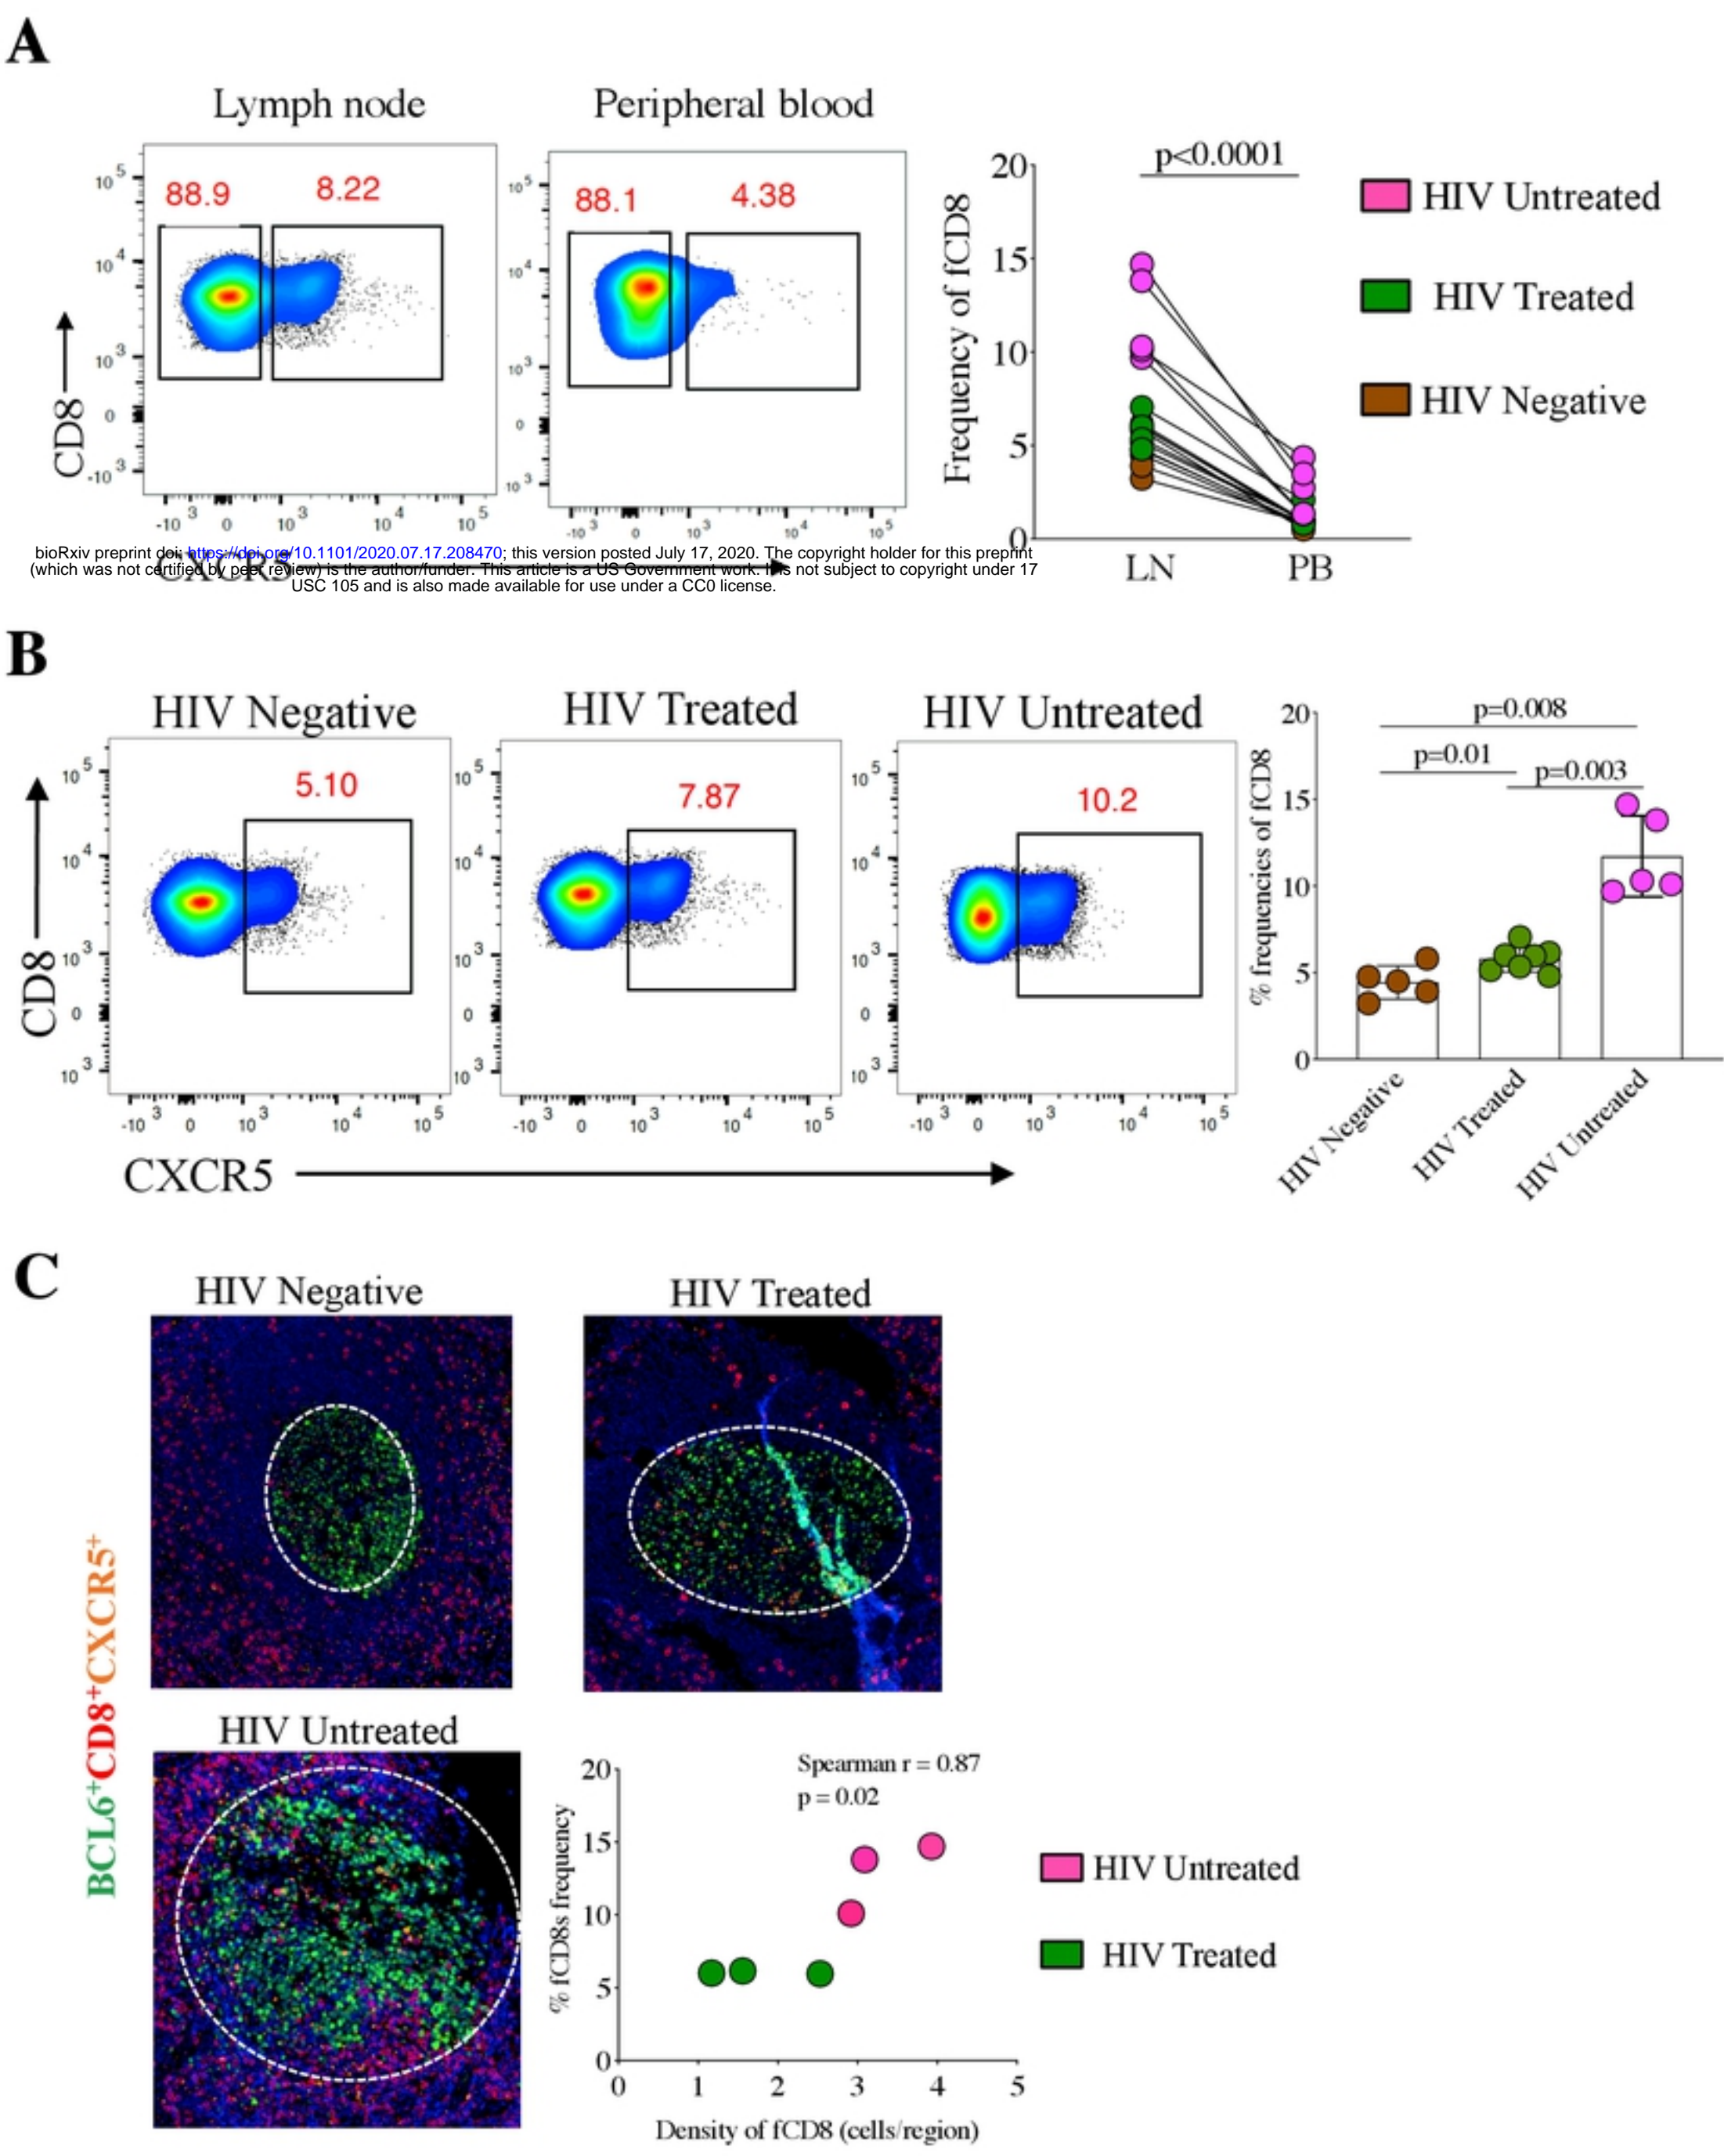

bioRxiv preprint doi: <https://doi.org/10.1101/2020.07.17.208470>; this version posted July 17, 2020. The copyright holder for this preprint (which was not certified by peer review) is the author/funder. This article is a US Government work. It is not subject to copyright under 17 USC 105 and is also made available for use under a CC0 license.



# Figure 2

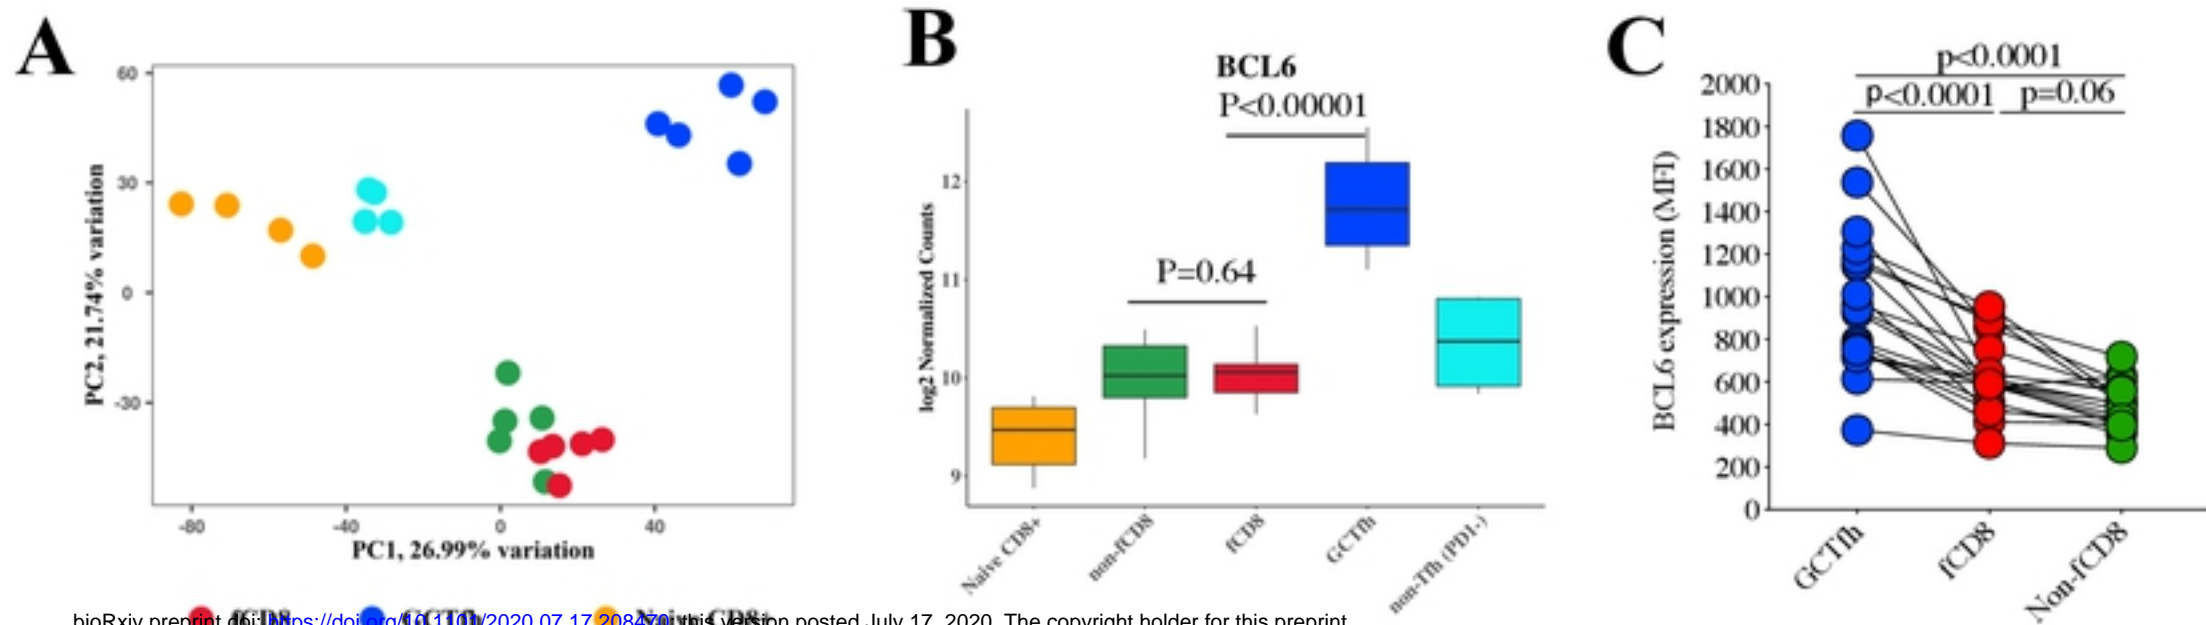

bioRxiv preprint doi: <https://doi.org/10.1101/2020.07.17.208470>; this version posted July 17, 2020. The copyright holder for this preprint (which was not certified by peer review) is the author/funder. This article is a US Government work. It is not subject to copyright under 17 USC 105 and is also made available for use under a CC0 license.

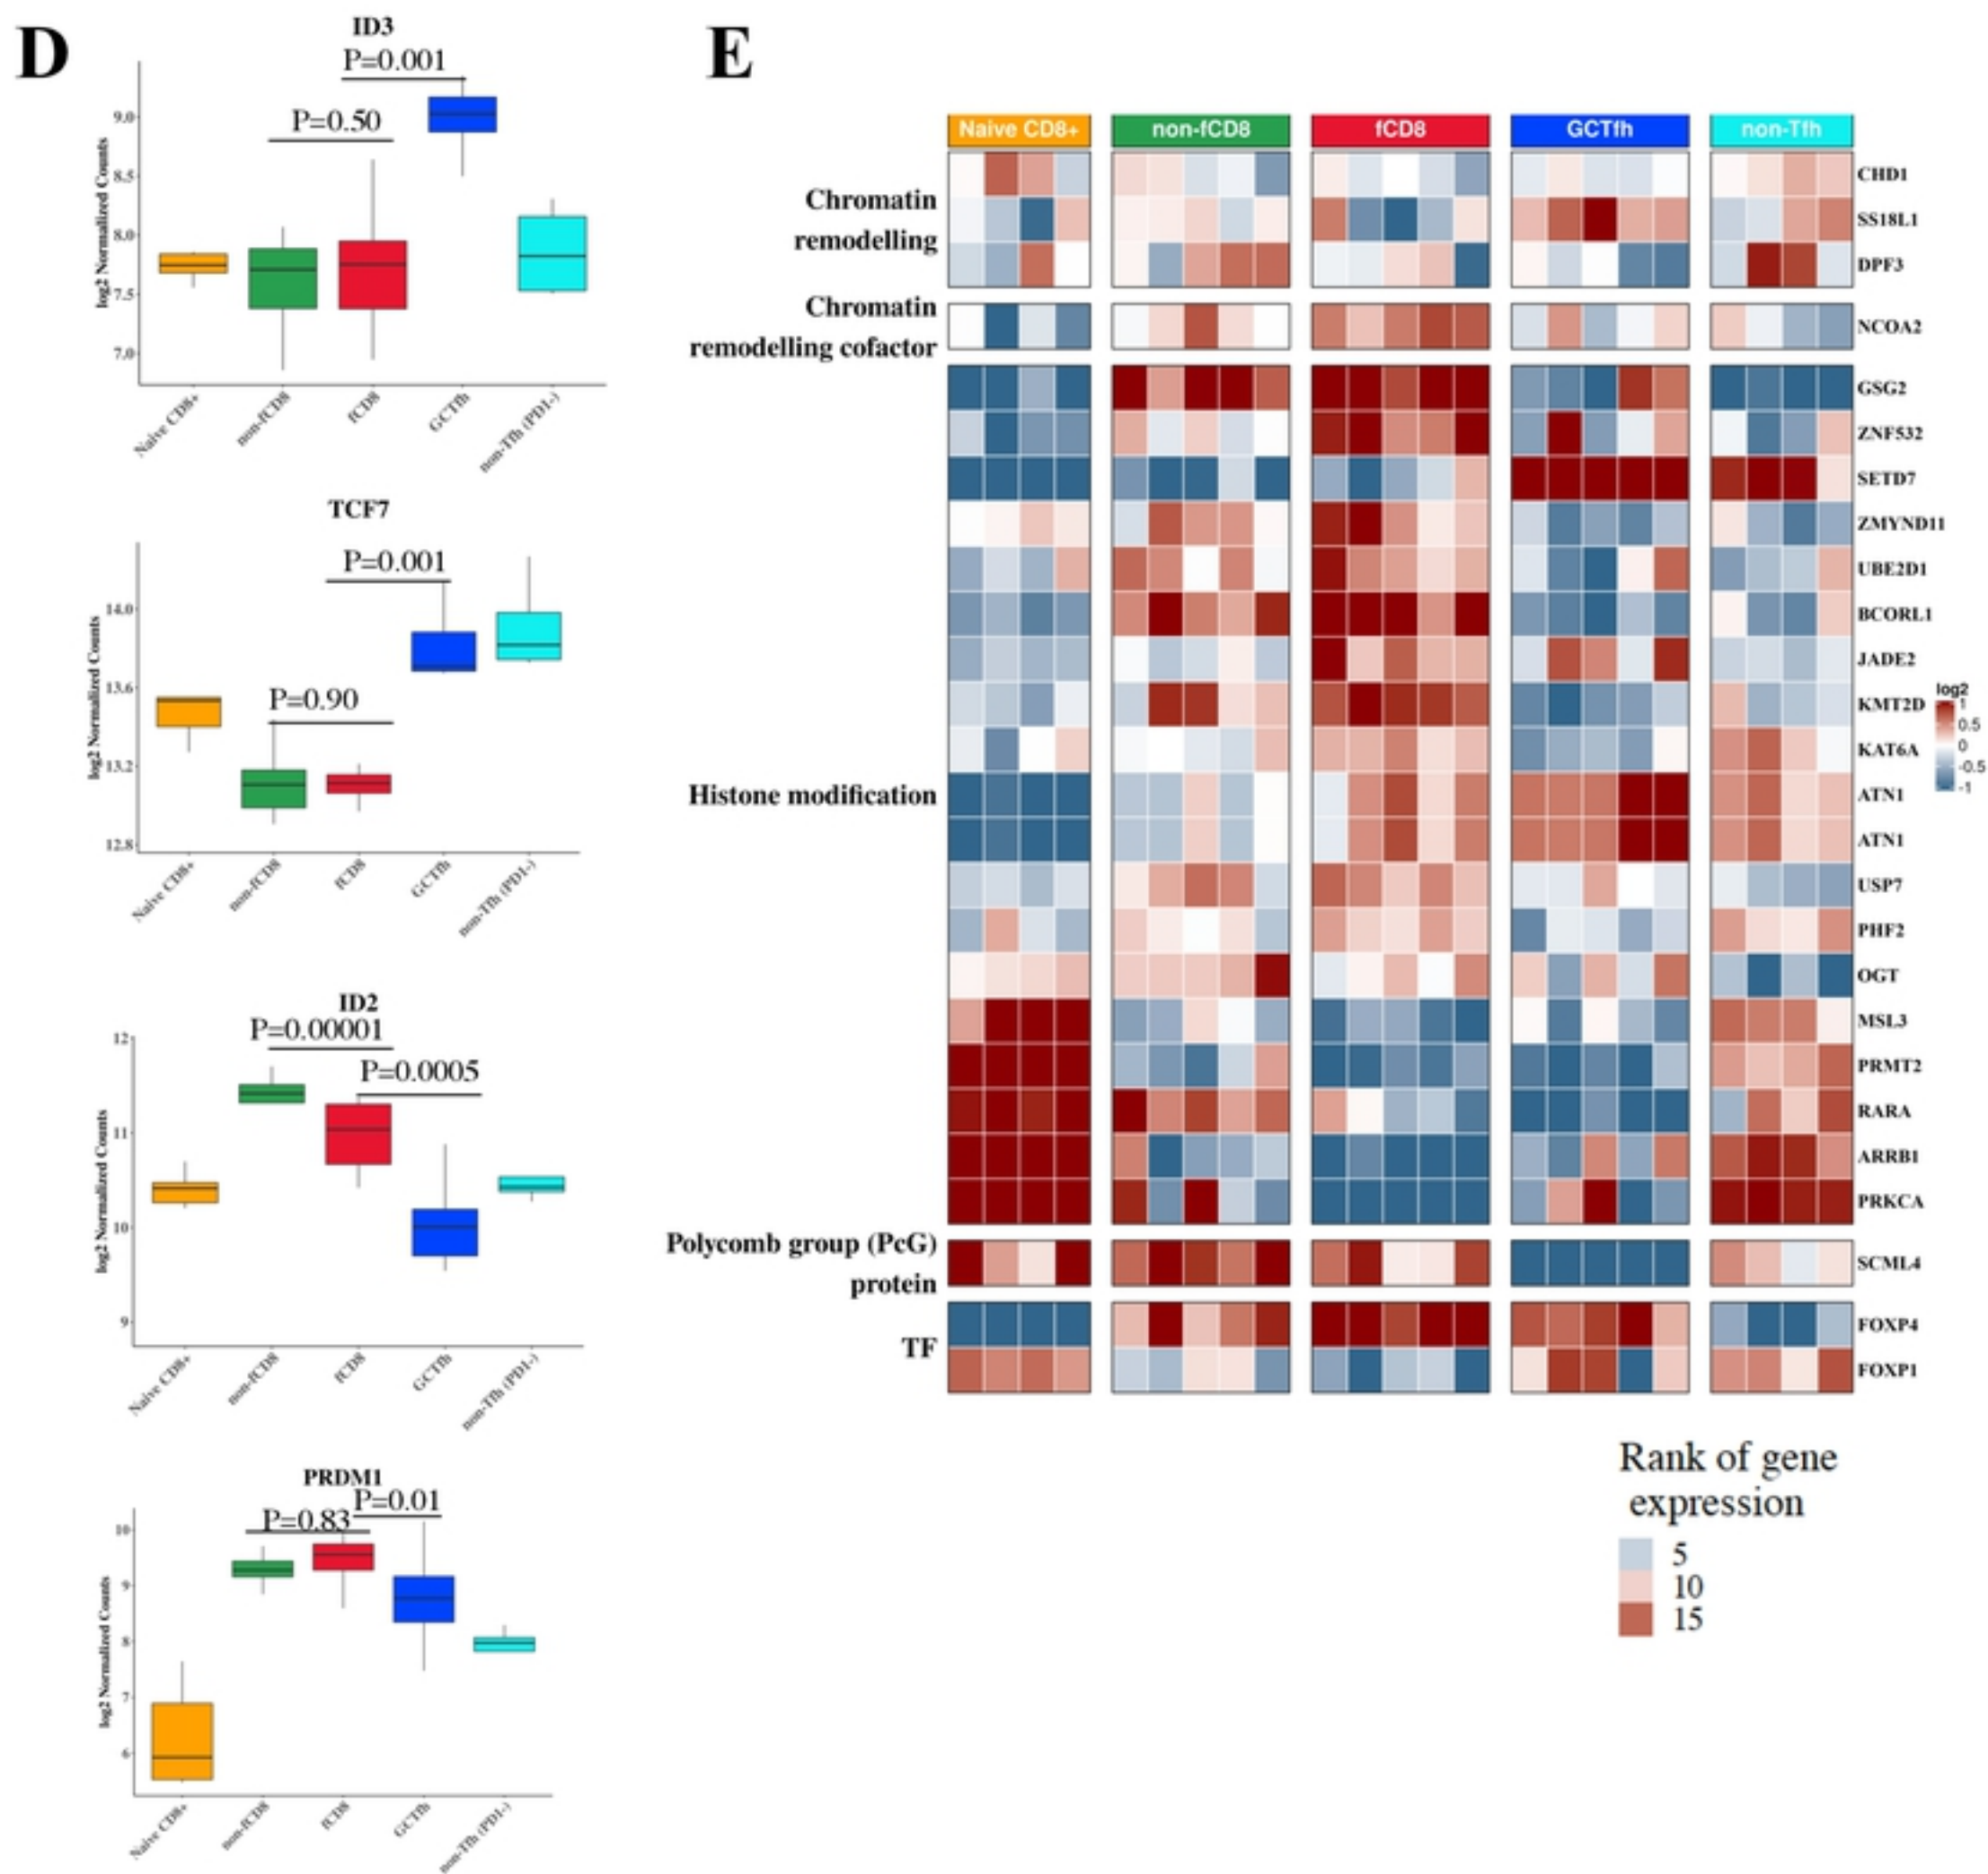

# Figure 3

## A

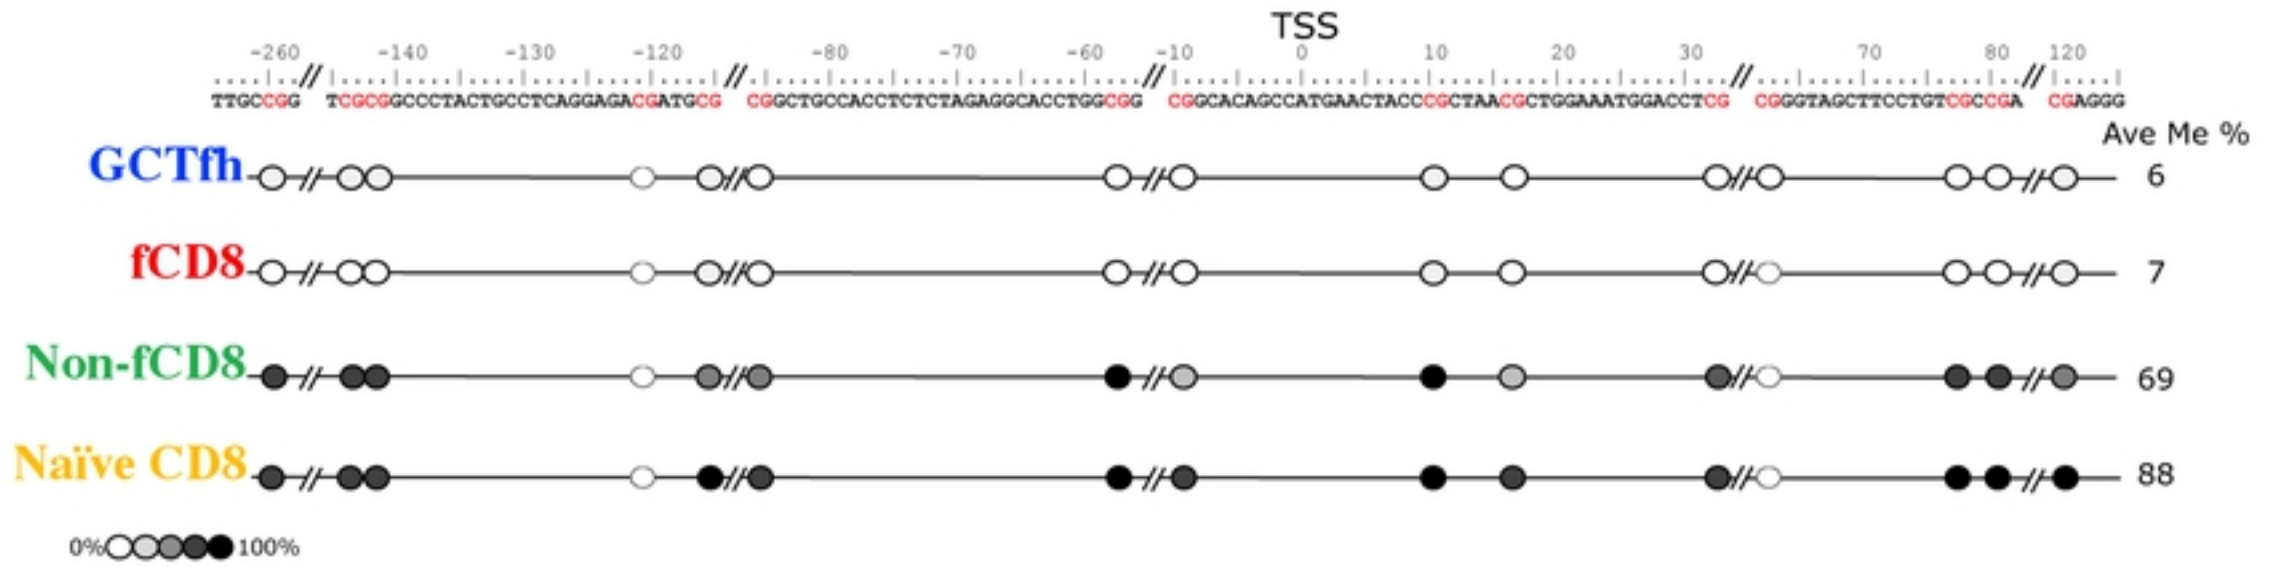

## B

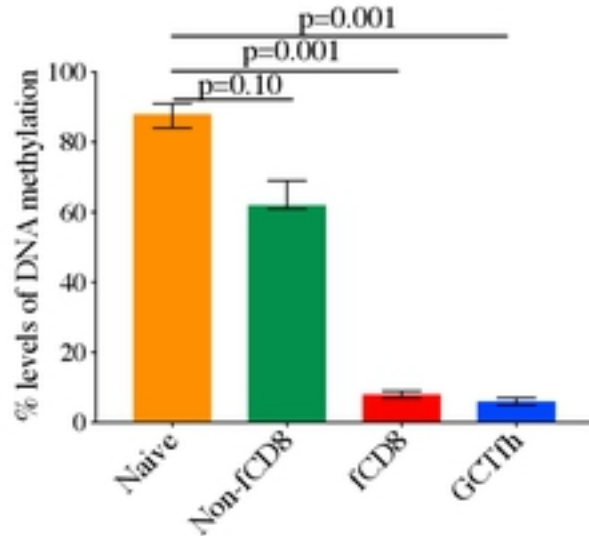

## C

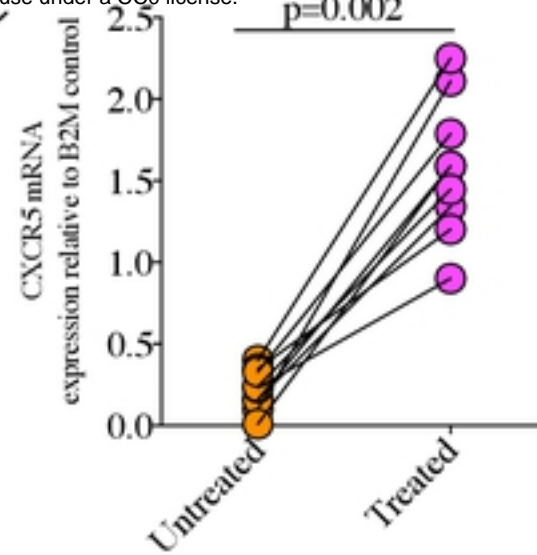

## D

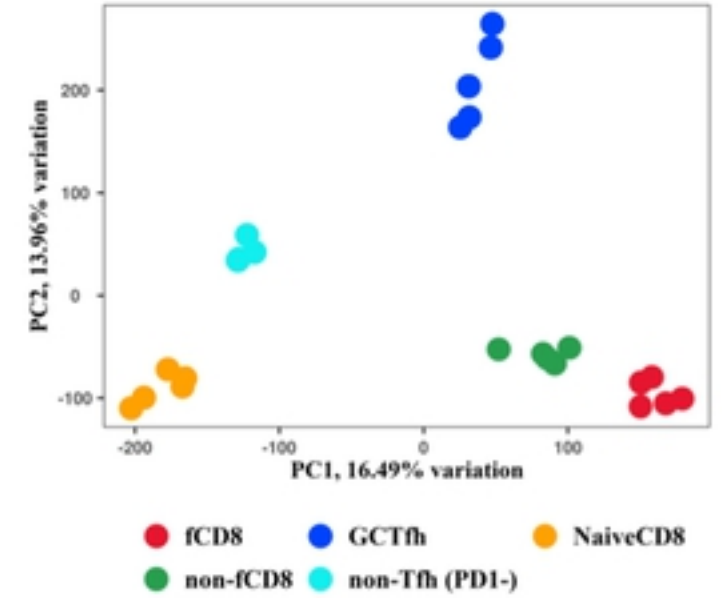

## E

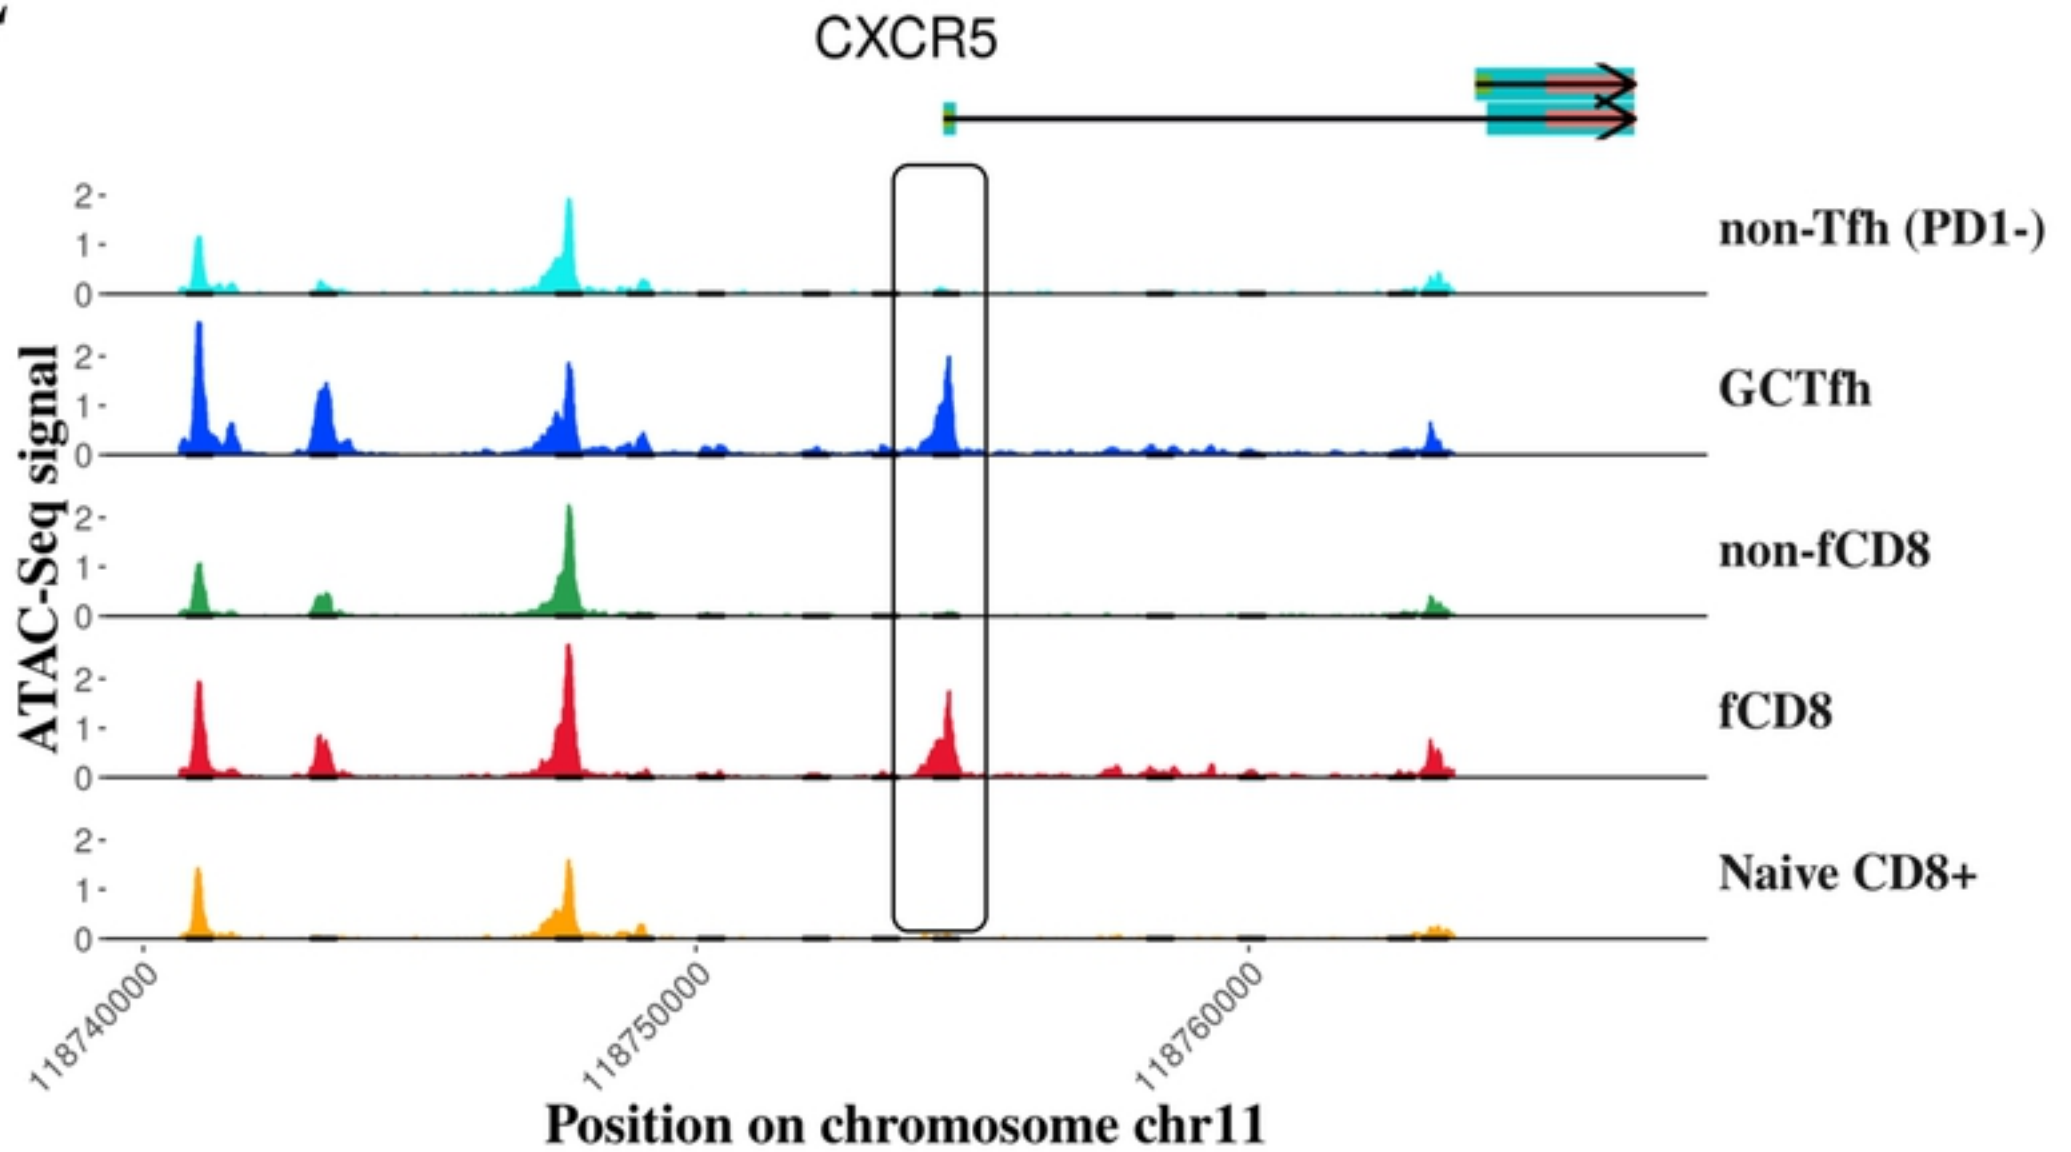

Figure 4

**A**

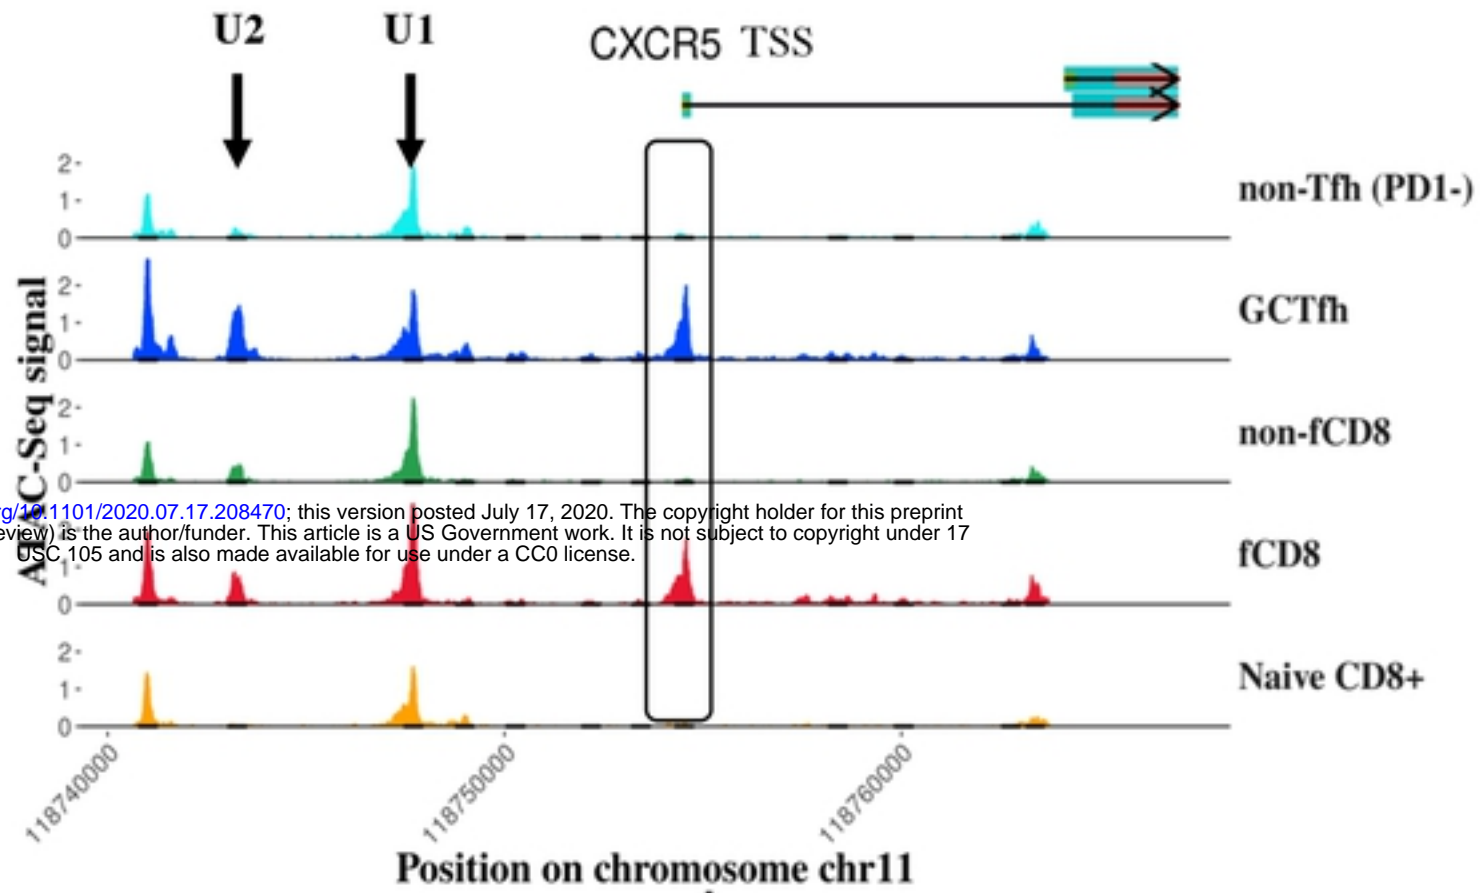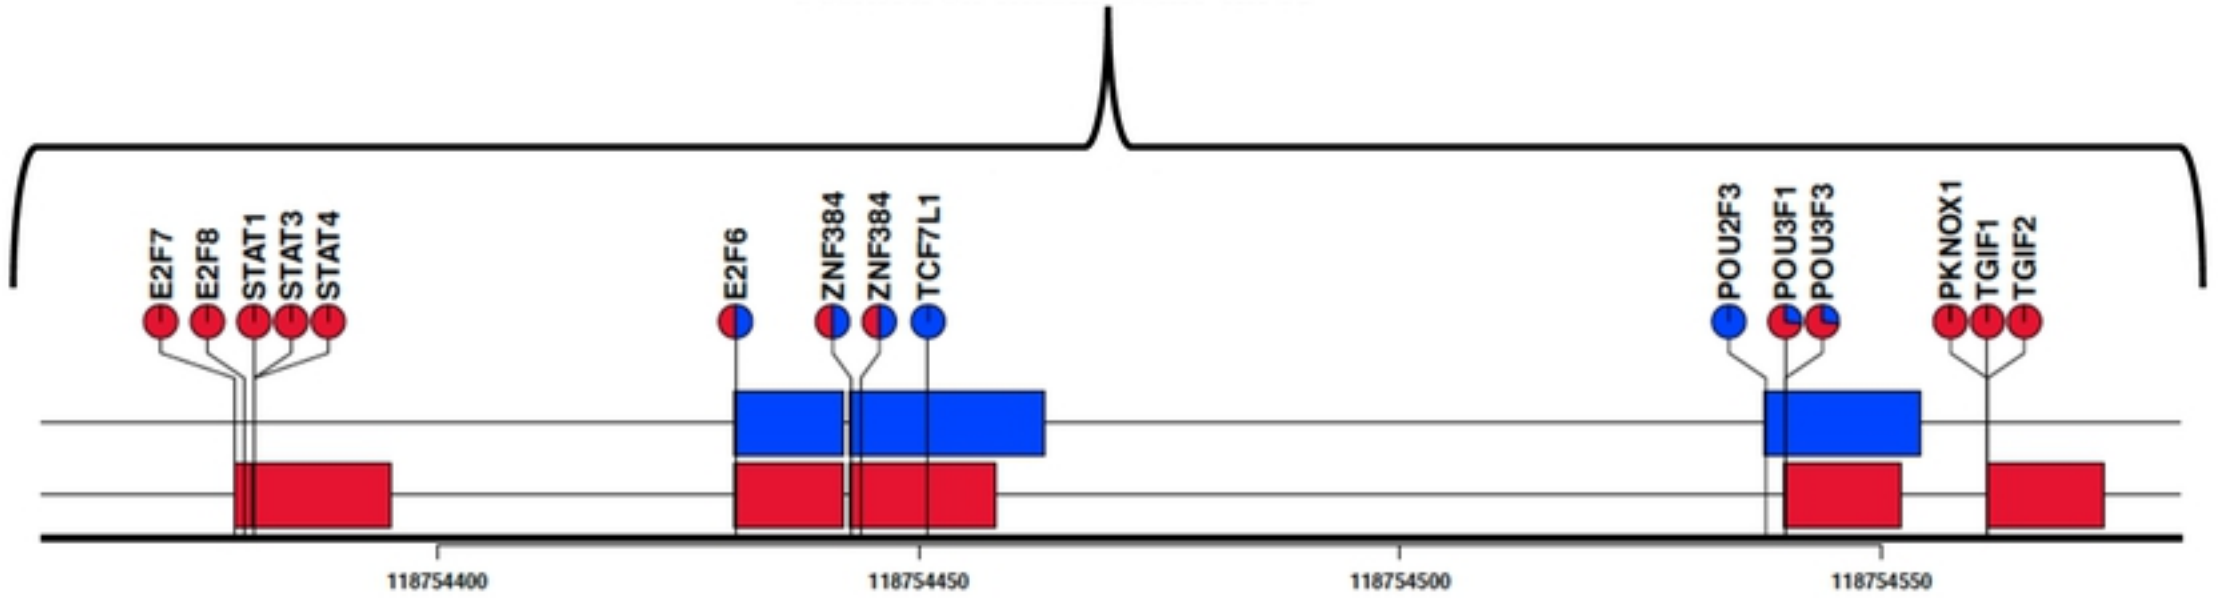

**B**

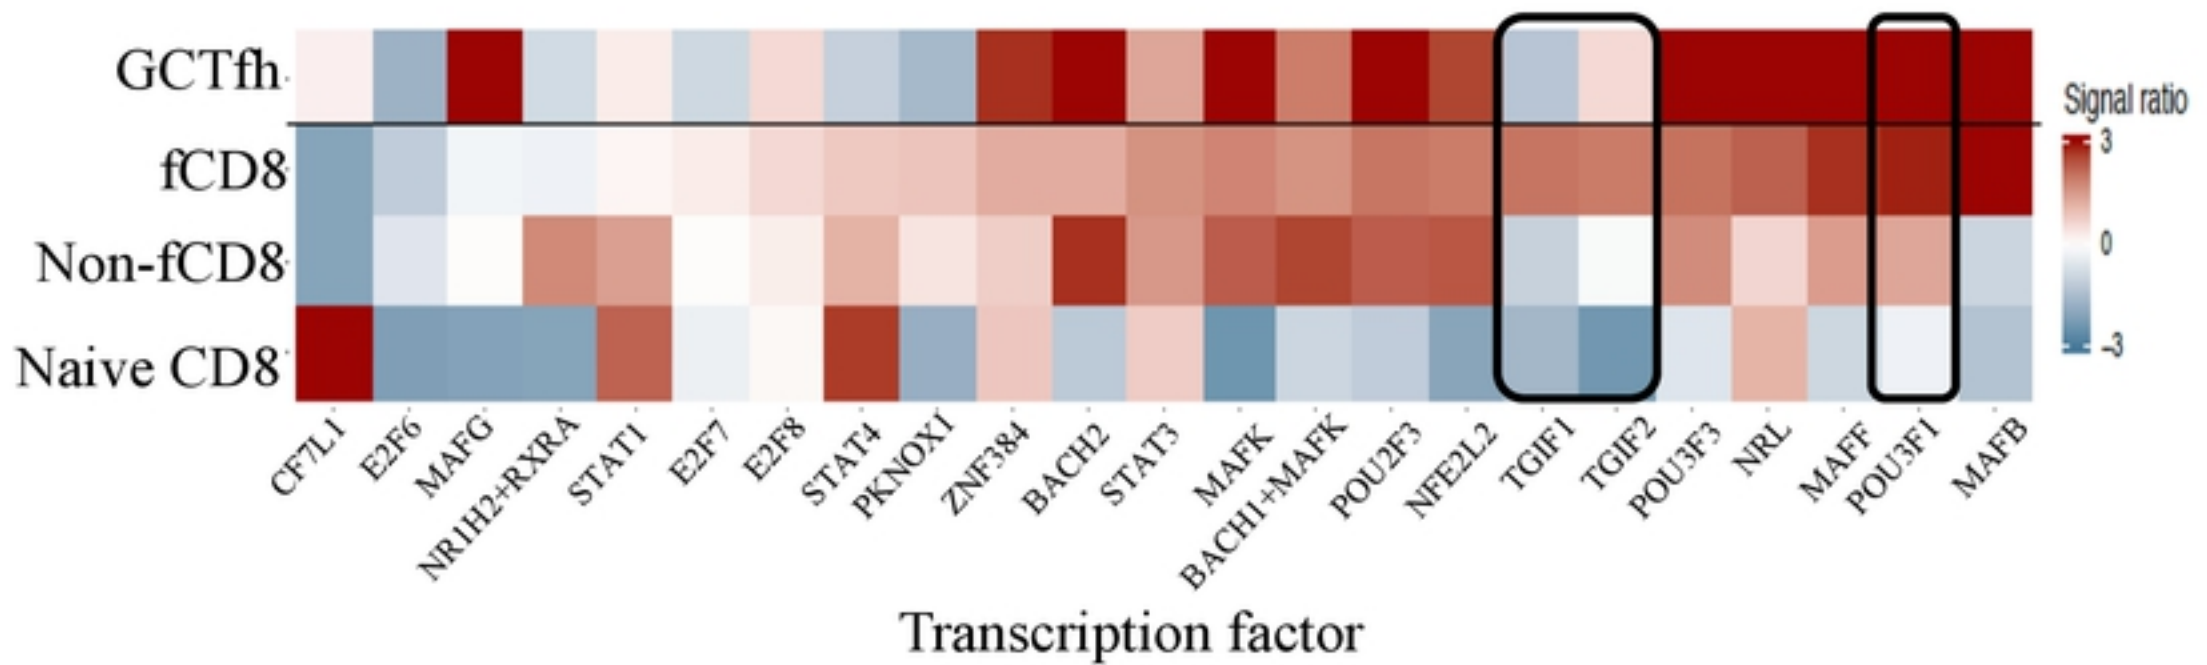

# Figure 5

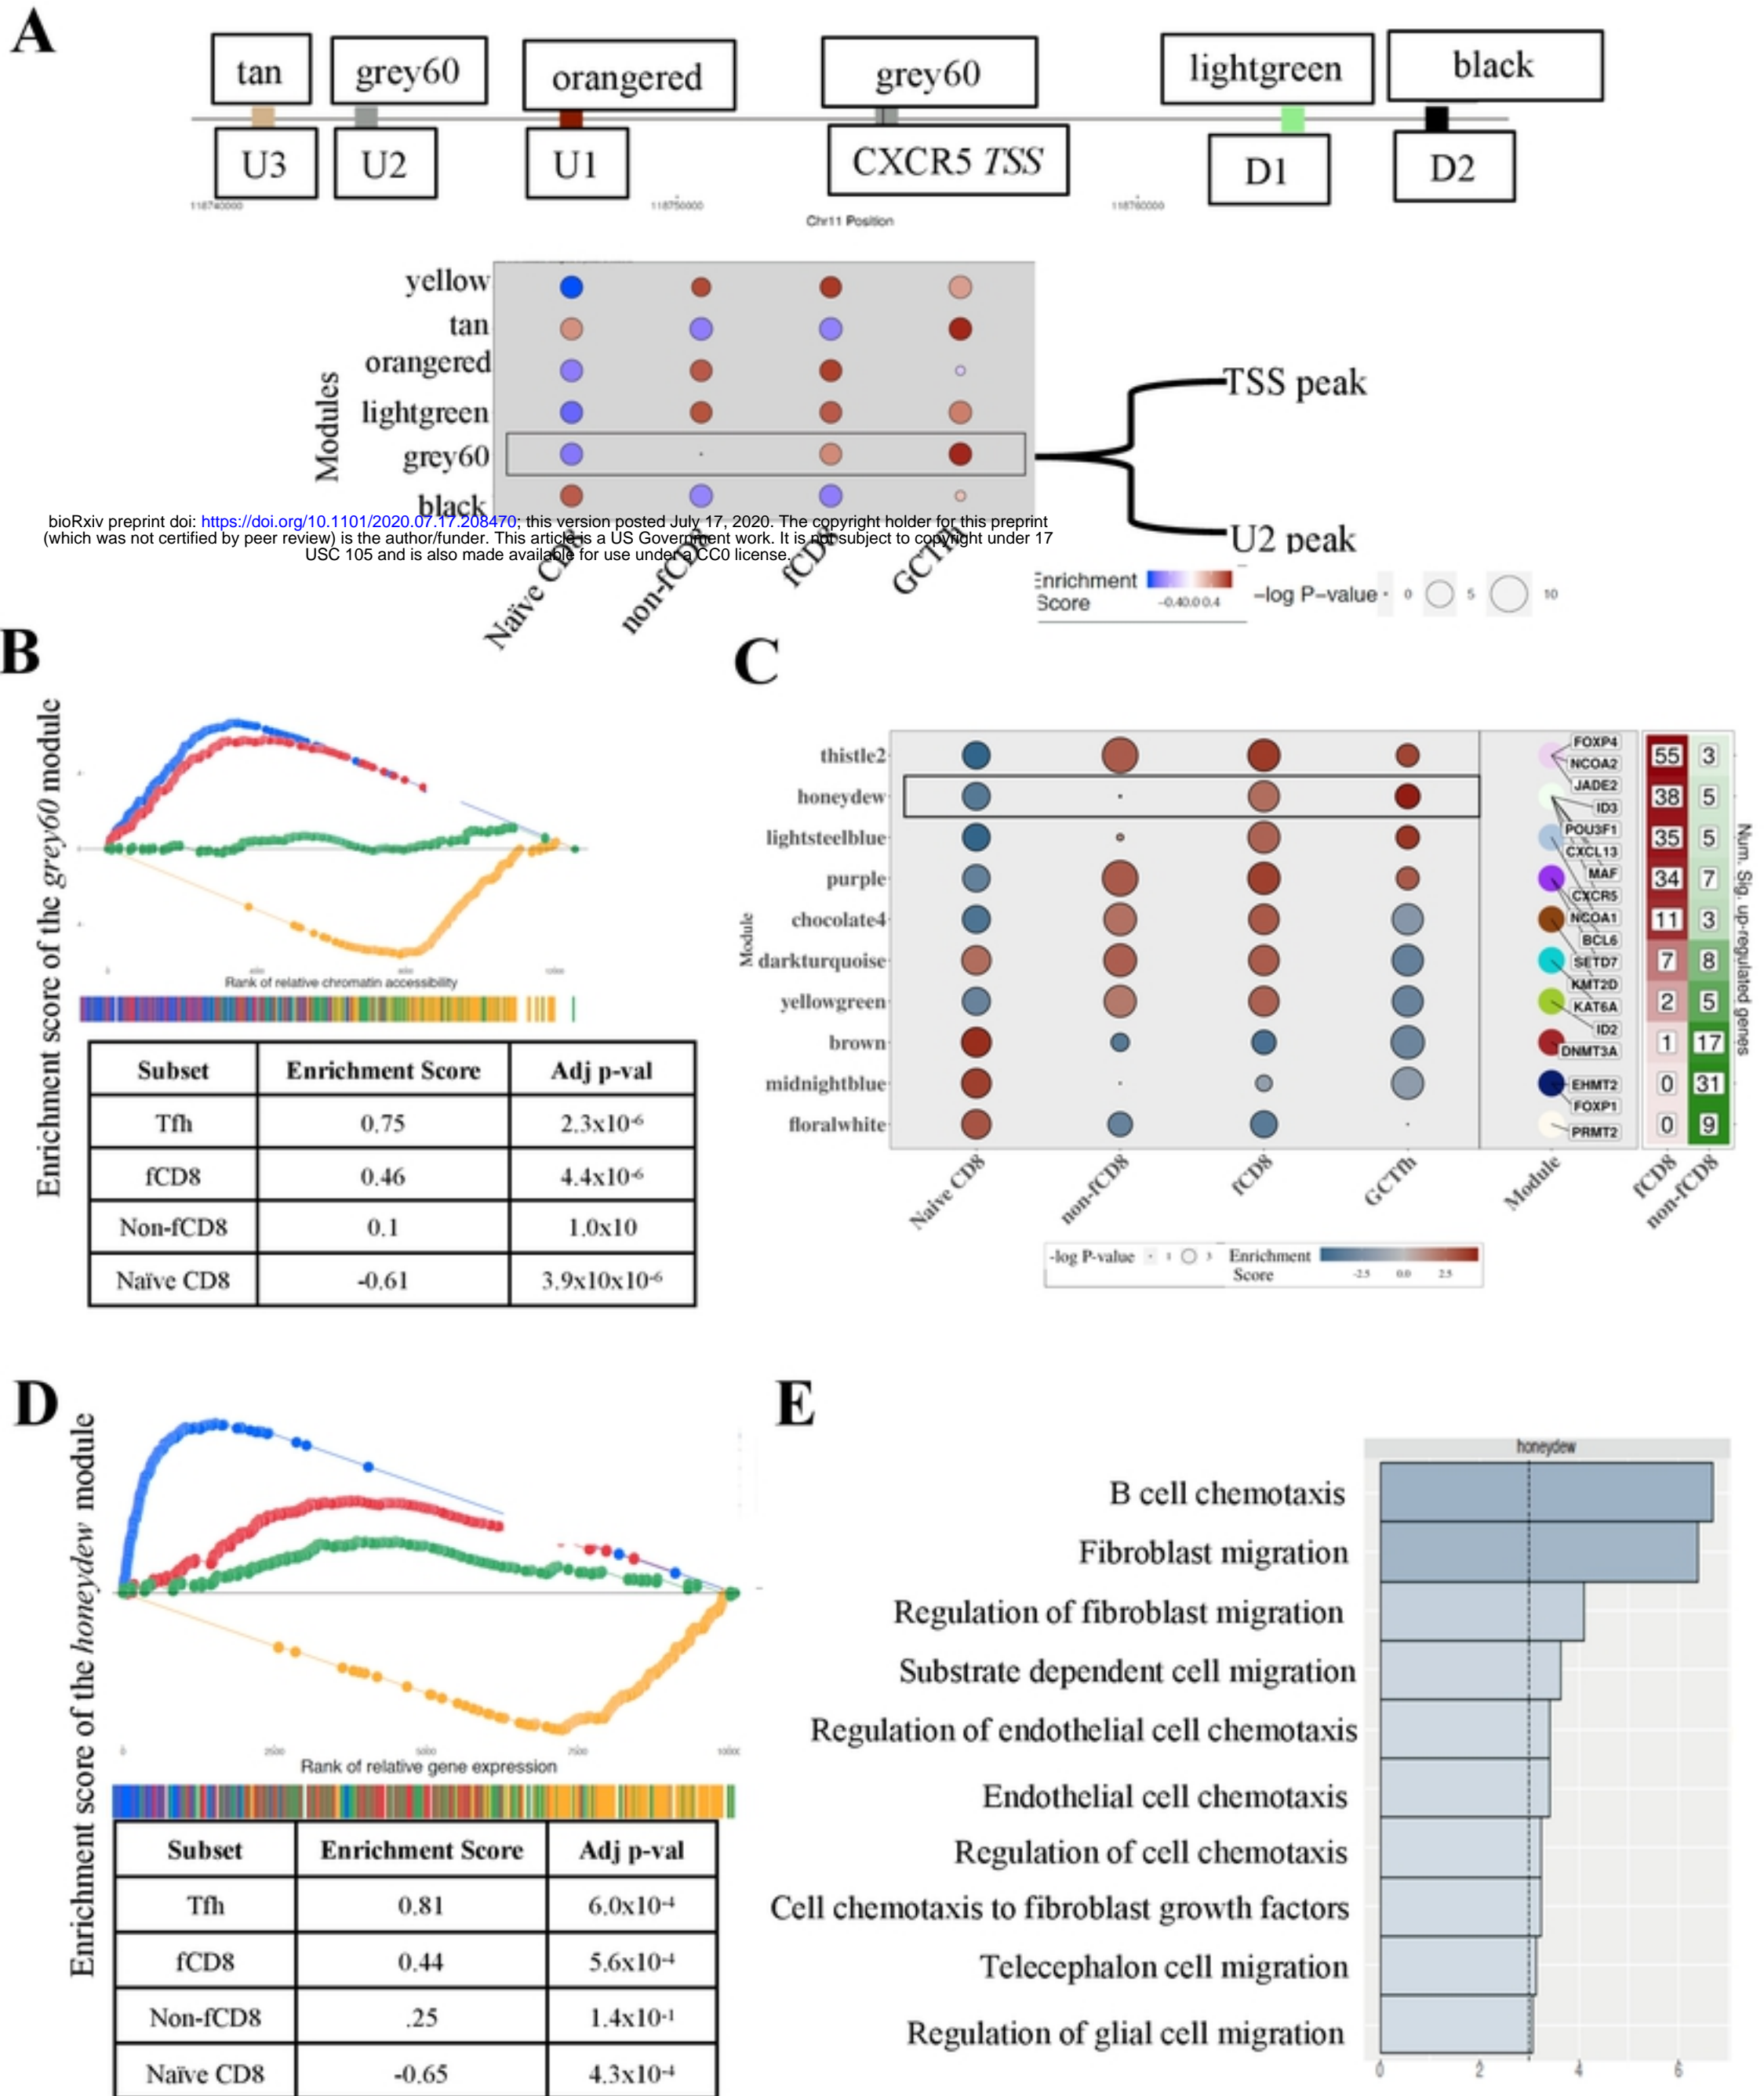

bioRxiv preprint doi: <https://doi.org/10.1101/2020.07.17.208470>; this version posted July 17, 2020. The copyright holder for this preprint (which was not certified by peer review) is the author/funder. This article is a US Government work. It is not subject to copyright under 17 USC 105 and is also made available for use under a CC0 license.

Figure 6

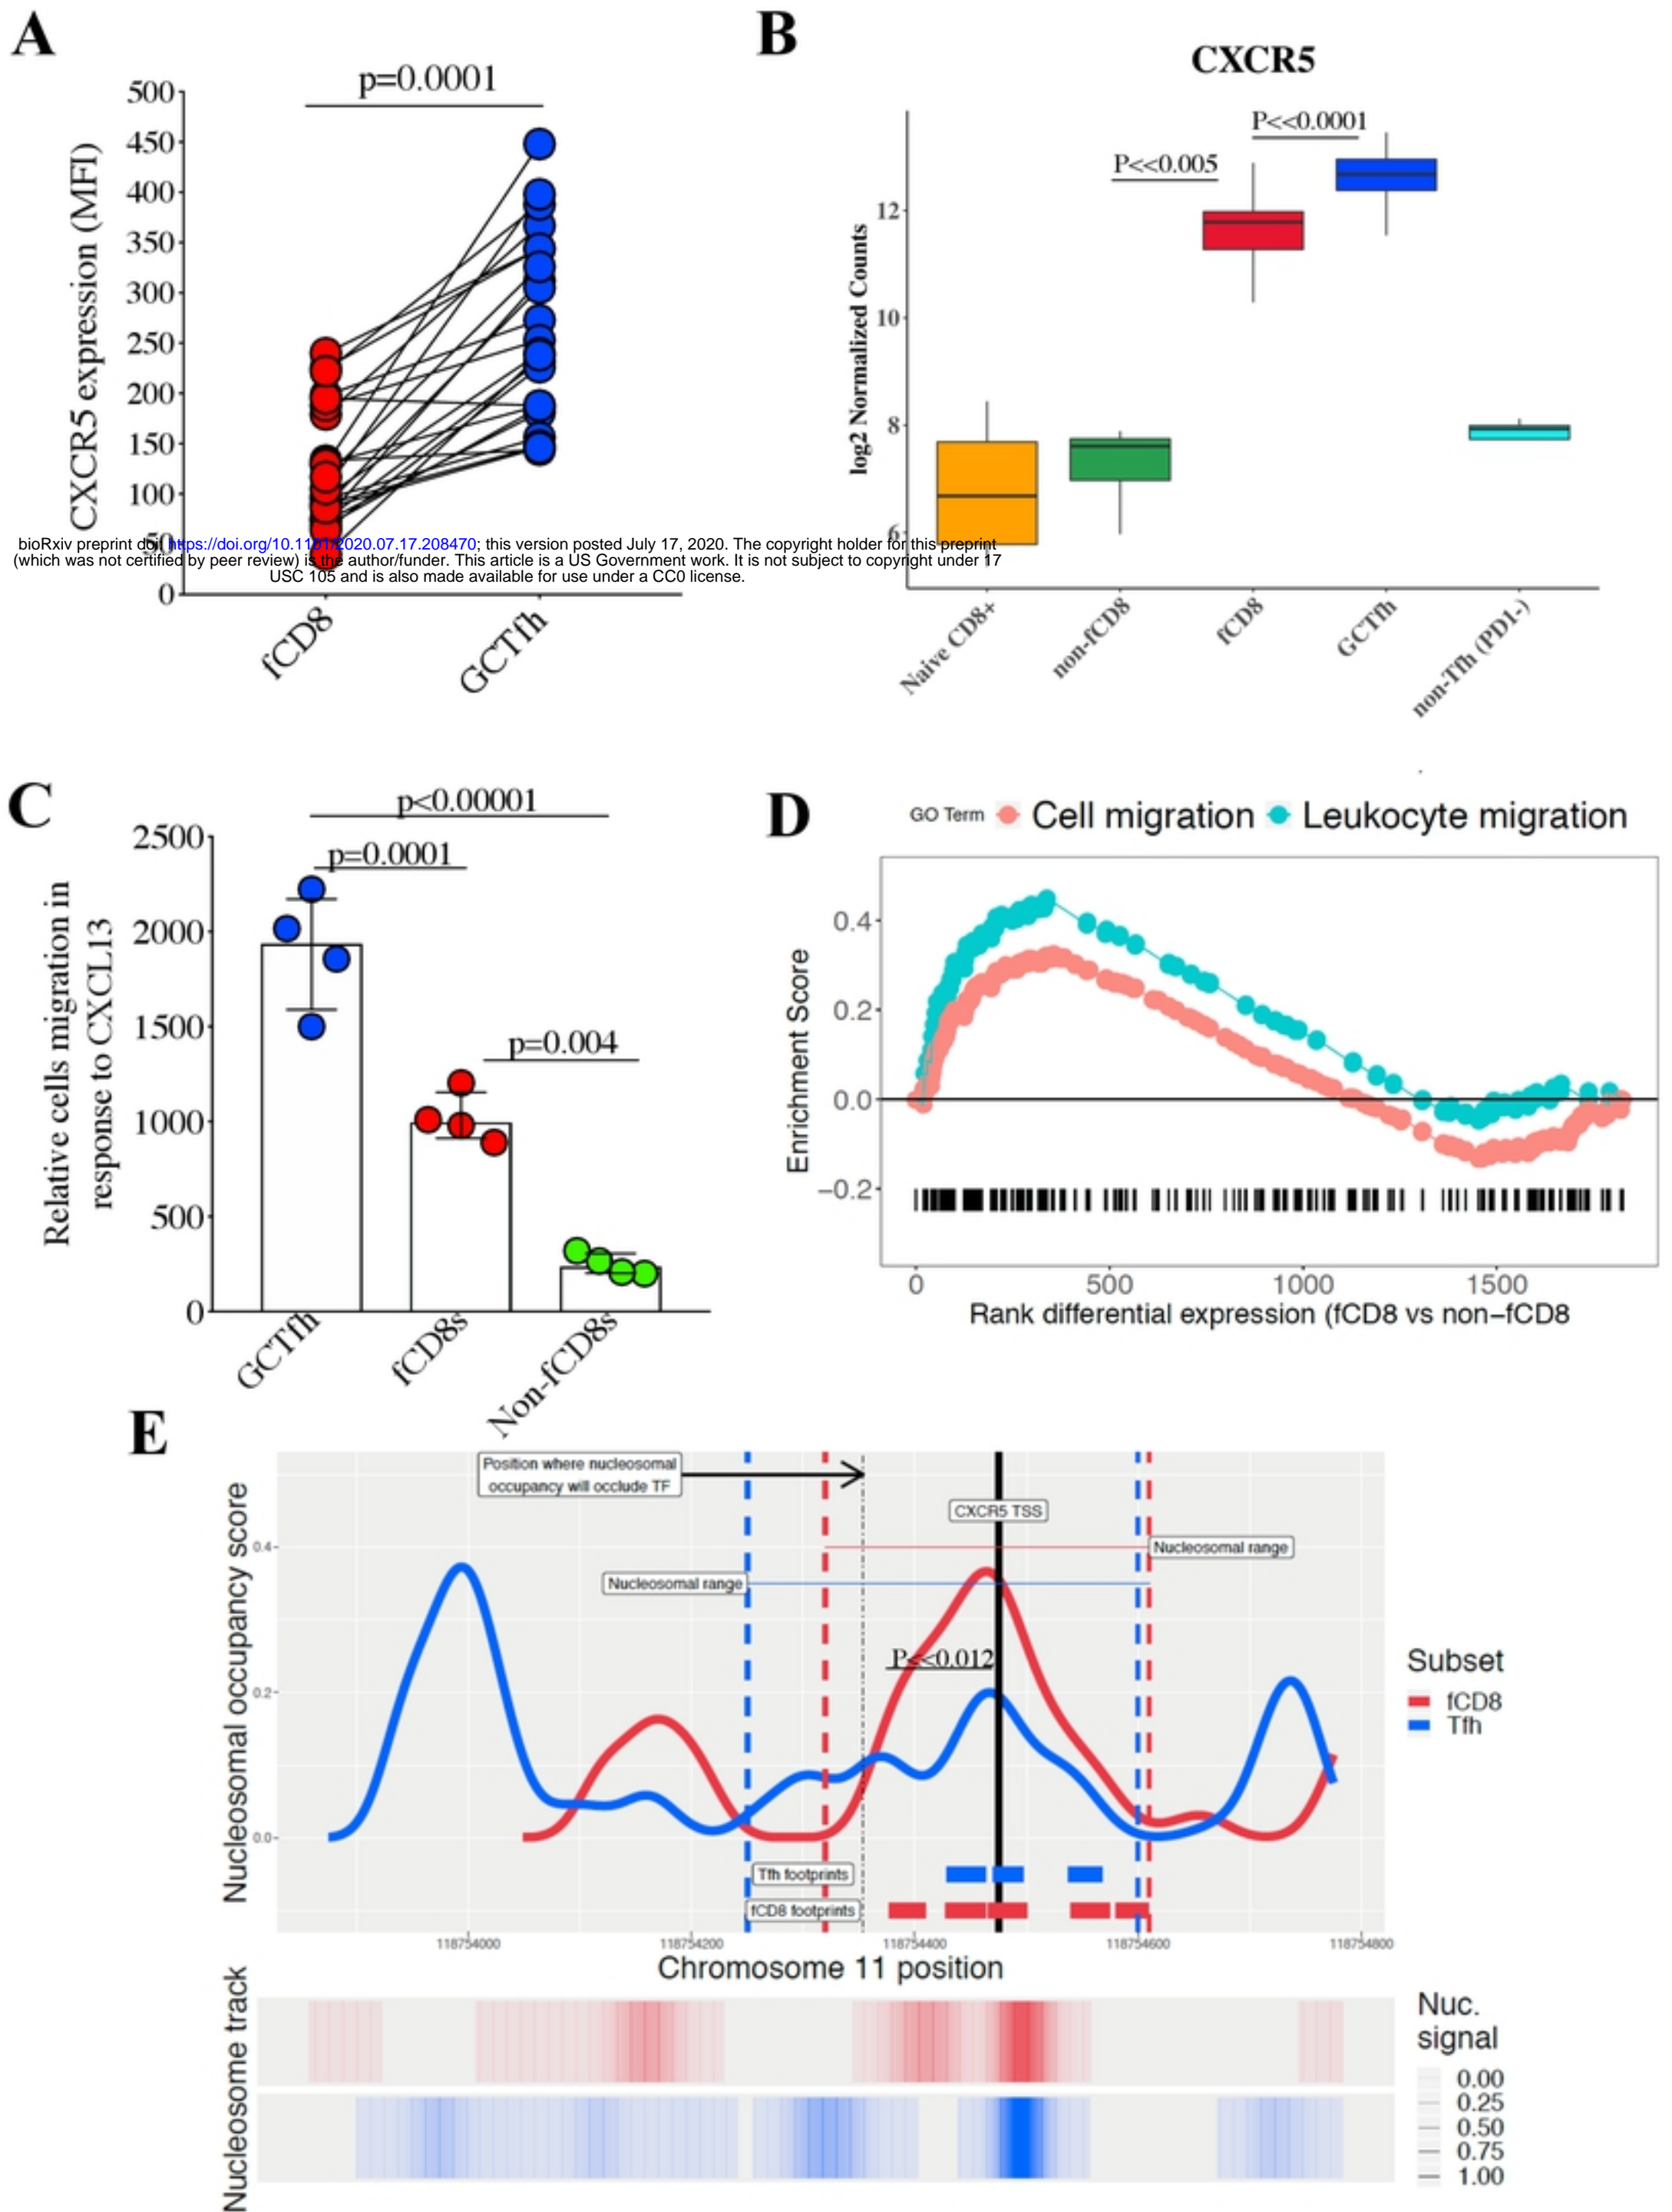

bioRxiv preprint doi: <https://doi.org/10.1101/2020.07.17.208470>; this version posted July 17, 2020. The copyright holder for this preprint (which was not certified by peer review) is the author/funder. This article is a US Government work. It is not subject to copyright under 17 USC 105 and is also made available for use under a CC0 license.
